1 **Evolutionarily conserved genetic interactions between *nphp-4* and *bbs-5* mutations**  
2 **exacerbate ciliopathy phenotypes**

3

4 Melissa R. Bentley-Ford<sup>\*¶</sup>, Melissa LaBonty<sup>\*¶</sup>, Holly R. Thomas<sup>†</sup>, Courtney J. Haycraft<sup>\*</sup>, Mikyla  
5 Scott<sup>\*</sup>, Cameron LaFayette<sup>\*</sup>, Mandy J. Croyle<sup>\*</sup>, John M. Parant<sup>†</sup>, Bradley K. Yoder<sup>\*</sup>

6

7 <sup>\*</sup>Department of Cell, Developmental, and Integrative Biology, University of Alabama at  
8 Birmingham, Birmingham, Alabama, United States of America 35294

9 <sup>†</sup>Department of Pharmacology and Toxicology, University of Alabama at Birmingham,  
10 Birmingham, Alabama, United States of America, 35294

11

12

13 Corresponding author: Bradley K. Yoder

14 E-mail: [byoder@uab.edu](mailto:byoder@uab.edu) (BKY)

15

16 <sup>¶</sup>These authors contributed equally to this work.

17

18 **Abstract**

19 Primary cilia are sensory and signaling hubs with a protein composition that is distinct  
20 from the rest of the cell due to the barrier function of the transition zone (TZ) at the base of the  
21 cilium. Protein transport across the TZ is mediated in part by the BBSome, and mutations  
22 disrupting TZ and BBSome proteins cause human ciliopathy syndromes. Ciliopathies have  
23 phenotypic variability even among patients with identical genetic variants, suggesting a role for  
24 modifier loci. To identify potential ciliopathy modifiers, we performed a mutagenesis screen on  
25 *nphp-4* mutant *C. elegans* and uncovered a novel allele of *bbs-5*. *Nphp-4;bbs-5* double mutant  
26 worms have phenotypes not observed in either individual mutant strain. To test whether this  
27 genetic interaction is conserved, we also analyzed zebrafish and mice mutants. While *Nphp4*  
28 mutant zebrafish appeared overtly normal, *Bbs5* mutants exhibited scoliosis. When combined,  
29 *Nphp4;Bbs5* double mutant zebrafish did not exhibit synergistic effects, but the lack of a phenotype  
30 in *Nphp4* mutants makes interpreting these data difficult. In contrast, viable *Nphp4;Bbs5* double  
31 mutant mice were not obtained and there were fewer mice than expected carrying three mutant  
32 alleles. Additionally, postnatal loss of *Bbs5* in mice using a conditional allele compromised  
33 survival when combined with a *Nphp4* allele. As cilia are formed in the double mutant mice, the  
34 exacerbated phenotype is likely a consequence of disrupted ciliary signaling. Collectively, these  
35 data support an evolutionarily conserved genetic interaction between *Bbs5* and *Nphp4* alleles that  
36 may contribute to the variability in ciliopathy phenotypes.

37

38

## 39 Introduction

40 Cilia are highly specialized microtubule-based structures that are evolutionarily conserved  
41 from protozoa to primates (CARVALHO-SANTOS *et al.* 2011; SUNG AND LEROUX 2013). While there  
42 are exceptions, cilia can be described as either motile or non-motile and are made up of either a  
43 9+2 or 9+0 radially symmetric microtubule scaffold, respectively (PORTER 1955). Motile cilia are  
44 typically present in multiples on epithelial cells lining surfaces in tissues such as the lungs and  
45 reproductive tract and are responsible for movement of viscous materials along the epithelial  
46 surface. Non-motile cilia, or primary cilia, serve as a sensory and signaling hub for the cell and in  
47 vertebrates, are present on nearly every cell type (SATIR AND CHRISTENSEN 2007). In humans, the  
48 failure of the cilium to form or function properly manifests in a spectrum of syndromes collectively  
49 termed *ciliopathies*. The phenotypes observed among ciliopathies are highly variable (REITER AND  
50 LEROUX 2017). Classic ciliopathies such as ALMS (Alstrom Syndrome, OMIM #203800) (TSANG  
51 *et al.* 2018), BBS (Bardet-Biedl Syndrome, OMIM #209900) (SUSPITSIN AND IMYANITOV 2016),  
52 JBTS (Joubert Syndrome, OMIM #213300) (VALENTE *et al.* 2013), MKS (Meckel-Gruber  
53 Syndrome, OMIM #249000) (HARTILL *et al.* 2017), NPHP (Nephronophthisis, OMIM #256100)  
54 (LUO AND TAO 2018), OFD (Oral-facial-digital syndrome, OMIM #311200) (FRANCO AND  
55 THAUVIN-ROBINET 2016), PKD (Polycystic Kidney Disease, OMIM #173900) (YODER 2007), and  
56 SLSN (Senior- LØken syndrome, OMIM #266900) (RONQUILLO *et al.* 2012) present with  
57 pathologies that include, but are not limited to, developmental delay, obesity, hypogonadism,  
58 polydactyly, kidney cysts, and retinopathies. Patients can display a wide variability in symptoms  
59 with little correlation to specific genetic mutations. One possible explanation for the variability in  
60 the phenotypes could be modifier alleles in other ciliopathy genes in the patient's genetic  
61 background.

62           Following ciliary assembly, a functional primary cilium requires the precise orchestration  
63 of multiple complexes to carry out cell signaling events. The cilium's transition zone (TZ), located  
64 at the base, is ideally positioned to function as a barrier between the ciliary compartment and the  
65 rest of the cell (CHIH *et al.* 2011; GARCIA-GONZALO *et al.* 2011). The TZ is made up of 3 main  
66 modules: the NPHP, MKS, and CEP290 complexes (SANG *et al.* 2011). For the cilium to function  
67 properly, the TZ not only serves as a barrier but it must also facilitate the passage of necessary  
68 materials into and out of the cilium. To do this it must work coordinately with Intraflagellar  
69 Transport (IFT) complexes and the BBSome (ZHAO AND MALICKI 2011; GOETZ *et al.* 2017; YE *et*  
70 *al.* 2018). While retrograde (IFT-A) and anterograde (IFT-B) IFT particles are required for ciliary  
71 assembly, maintenance, cargo transport, and disassembly, the BBSome is an octameric complex  
72 responsible for shuttling transmembrane proteins through the TZ into and out of the cilium but  
73 does not typically affect cilia assembly (NACHURY *et al.* 2007; LOKTEV *et al.* 2008; NAKAYAMA  
74 AND KATOH 2018).

75           The highly conserved nature of the cilium and its underlying mechanisms allows for studies  
76 to be performed in a wide variety of model organisms. Zebrafish have become a powerful tool to  
77 better understand the underlying mechanisms of ciliopathies (DRUMMOND 2009). Zebrafish have  
78 both motile and non-motile cilia as seen in mammalian systems. Additionally, *ex utero*  
79 development and the transparency of zebrafish embryos allow for easy visualization of  
80 developmental abnormalities in cilia mutants. *C. elegans* is another powerful tool to study ciliary  
81 proteins and to understand the genetic interactions between mutations in ciliary genes. Mutations  
82 in cilia genes that would otherwise be lethal in vertebrate models result in easily quantifiable  
83 behavioral abnormalities such as altered chemotaxis, defects in dauer formation, and osmotic  
84 avoidance defects, but not lethality. *C. elegans* contain a single ciliated cell type, the sensory

85 neuron (INGLIS *et al.* 2007). In hermaphrodites, this includes 60 ciliated sensory neurons. A subset  
86 of these ciliated neurons, the eight pairs of bilaterally symmetric amphid neurons at the nose of  
87 the animal (ASE, ASG, ASH, ASI, ASJ, ASK, ADF, ADL) and 2 pairs of symmetrical phasmid  
88 neurons in the tail (PHA and PHB), project through the cuticle exposing them to the external  
89 environment (WARD *et al.* 1975). This allows cilia integrity to be readily assayed through a  
90 lipophilic dye-filling protocol (PERKINS *et al.* 1986). Additionally, the short life cycle of *C. elegans*  
91 make them a tractable tool to perform forward genetic screens (PERKINS *et al.* 1986; YEE *et al.*  
92 2015).

93 In previous work, we conducted a modifier screen in *C. elegans nphp-4* mutants to uncover  
94 novel alleles that exacerbate ciliopathy phenotypes (MASYUKOVA *et al.* 2016). In support of  
95 previous studies showing a genetic interaction between *nphp-4* and *bbs-5* (YEE *et al.* 2015), we  
96 identified a novel, and more severe, allele of *bbs-5*. In this work, we extend the previous studies  
97 and identify behavioral effects of loss of *bbs-5* and *nphp-4* and demonstrate this new allele is more  
98 detrimental than the previously published *bbs-5* deletion allele. To determine if this genetic  
99 interaction is evolutionarily conserved, *Nphp4* and *Bbs5* mutant zebrafish and mice were analyzed.  
100 Interestingly, double mutant fish do not show an additive effect over the abnormalities shown in  
101 *Bbs5* single mutant fish, although assessing possible genetic interactions in the fish model is  
102 complicated due to the absence of any overt phenotype in *Nphp4* single mutants. In contrast to the  
103 zebrafish model, double mutant mice are nonviable and highlight neurological manifestations that  
104 are not detected in either of the single mutants alone. Additionally, we observed reductions in the  
105 number of mice containing any combination of three *Nphp4* and *Bbs5* mutant alleles supporting  
106 the conservation of genetic interactions between *Bbs5* and *Nphp4* alleles across species. The  
107 conserved genetic interactions we observed in these mouse models demonstrate that the overall

108 genetic mutational load in cilia related genes will impact the severity and variability of phenotypes  
109 presented by ciliopathy patients.

110

## 111 **Materials and methods**

### 112 *C. elegans strains*

113 Nematodes were cultivated on NGM agar plates with *E. coli* OP50 bacteria according to standard  
114 techniques (BRENNER 1974). Nematode culture and observations were performed at 20°C, unless  
115 otherwise indicated. The strains used in this study are described in Supplementary Table 1.

116

### 117 *C. elegans Genetic Crosses*

118 All double mutant and reporter strains were generated using standard genetic techniques (BRENNER  
119 1974). Homozygosity of alleles and presence of transgenes was confirmed by PCR genotyping  
120 and observation of reporter expression using epifluorescence microscopy.

121

### 122 *Generation of Transgenic C. elegans Strains*

123 To generate the strains YH2108 and YH2114, a mixture of the following plasmids was injected  
124 into the syncytial gonad of YH1158 or YH1126 adult animals, respectively: 5 ng/μl p341 [*rpi-*  
125 *2p::RPI-2::GFP*], 5 ng/μl p350 [*osm-5p::TRAM-1::tdTomato*], 50 ng/μl pRF4 [*rol-6(su1006)*], 90  
126 ng/μl pBluescript II.

127

### 128 *Dye-filling in C. elegans*

129 Dye-filling assays were performed as described previously with modifications (PERKINS *et al.*  
130 1986). Briefly, synchronized L4 animals were washed off NGM plates using M9 buffer and

131 collected into 1.5 ml tubes. Following two washes with M9 buffer, animals were resuspended in  
132 200  $\mu$ l of M9 and 1  $\mu$ l of 2 mg/ml DiI (Molecular Probes, Carlsbad, CA) in dimethylformamide  
133 (DMF) was added. Animals were incubated in DiI in M9 for 2 hours, rocking gently. After  
134 incubation, animals were washed twice with M9 buffer and returned to a fresh NGM plate with  
135 OP50. Dye-filling in amphid and phasmid neurons was observed in adults 24 hours later using a  
136 Nikon SMZ18 fluorescence stereomicroscope. Worms were scored as “Normal” if all  
137 amphid/phasmid neurons showed complete dye-filling, “Partial Dyf” if some dye-filling was lost  
138 in the amphids/phasmids, and “Dyf” if there was no dye-filling detected in the amphids/phasmids.  
139 For fluorescent imaging, animals were anesthetized using 10 mM levamisole in M9 and  
140 immobilized on a 2% agar pad. Confocal images were captured on a Nikon Spinning-disk confocal  
141 microscope with Yokogawa X1 disk, using Hamamatsu flash4 sCMOS camera. 60x apo-TIRF  
142 (NA=1.49). Images were processed using Nikon Elements and ImageJ software.

143

#### 144 *Behavioral Assays in C. elegans*

145 Chemotaxis assays were performed as described (BARGMANN 1993; LEE AND PORTMAN 2007).  
146 Briefly, to prepare assay plates, 8 g of agar was added to 500 ml of deionized (DI) H<sub>2</sub>O, the solution  
147 was boiled to fully dissolve the agar, and the following solutions were added after cooling to below  
148 65°C: 2.5 ml 1 M Phosphate buffer, 500  $\mu$ l 1 M CaCl<sub>2</sub>, 500  $\mu$ l 1 M MgSO<sub>4</sub>. 10 ml of agar solution  
149 was added to 6 cm petri dishes and left to dry for between 3 and 7 days (longer during humid  
150 seasons). Prior to the start of assays, plates were marked with spots 4 cm apart to indicate the site  
151 of odorant and control (95% ethanol) compounds. Odorant compounds were prepared fresh each  
152 time in 95% ethanol at the following concentrations: diacetyl 1:1000; pyrazine 10 mg/ml; 2,3-  
153 pentanedione 1:1000; benzaldehyde 1:200. To start assays, worms were collected into 1.5 ml tubes

154 with M9 buffer, then washed twice with M9, and washed once with DI H<sub>2</sub>O. 1  $\mu$ l of 0.8 M sodium  
155 azide was added to marked spots on plates. Worms in a small amount of water were transferred to  
156 assay plates at a location equidistant between marked spots. 1  $\mu$ l each of odorant or control  
157 compound was added to the respective marked spots, then a kimwipe was used to wick away  
158 excess water from worms. The total number of worms per plate was counted immediately  
159 following water removal (50-150 worms/plate). After 60 minutes, the number of worms  
160 immobilized at each marked spot was scored. A chemotaxis index (CI) was calculated by  
161 subtracting the number of worms at the control spot from the number of worms at the odorant spot,  
162 then dividing by the total number of worms counted at the start of the experiment. Each odorant  
163 compound was tested at least five times per strain.

164

165 Dauer formation assays were performed as described previously (STARICH *et al.* 1995). Worms  
166 were grown on NGM plates to starvation (~9 days). Worms were then collected with M9 buffer,  
167 spun down, resuspended in 1% SDS in M9, and rocked gently for 1 hour at room temperature.  
168 After SDS treatment, worms were washed once with M9 buffer, then transferred to a fresh NGM  
169 plate with OP50. The presence of surviving dauer animals was assessed immediately and  
170 confirmed after 24 hours.

171

172 Egg laying and brood sizes were measured using the following methods. Synchronized L4 animals  
173 were singled out on NGM plates with OP50 and allowed to lay eggs for 24 hours. After 24 hours,  
174 the adult animals were transferred to fresh NGM plates and the number of eggs and hatchlings laid  
175 in the previous 24 hours were counted. This process was repeated every 24 hours until animals  
176 from all strains were no longer laying fertilized eggs (4 days). The total number of eggs laid by



177 each individual animal was calculated to determine the brood size. In addition, images were taken  
178 at 24 hours post-L4 to show eggs laid during the first 24-hour window of the time course.

179

180 To count the number of eggs present in the uterus, synchronized adults at 24 hours post-L4 were  
181 transferred to chilled NGM plates. A drop of bleach was placed on each worm to dissolve the  
182 cuticle. Remaining fertilized eggs were counted. Eggs were counted from 20 separate animals for  
183 each strain.

184

#### 185 *Fluorescence Recovery after Photobleaching (FRAP) in C. elegans*

186 To assess the mobility of ODR-10 in the AWA neurons, animals expressing ODR-10::GFP were  
187 anesthetized using 10 mM levamisole and immobilized on a 2% agar pad. A FRAP 100 mW 405  
188 nm laser was used to photobleach a portion of the AWA neuron and recovery was observed for 5  
189 minutes.

190

#### 191 *Vertebrate Animal Studies*

192 All vertebrate animal studies were conducted in compliance with the National Institutes of Health  
193 *Guide for the Care and Use of Laboratory Animals* and approved by the Institutional Animal Care  
194 and Use Committee at the University of Alabama at Birmingham.

195

#### 196 *Zebrafish Lines*

197 Zebrafish lines were maintained as previously described (WESTERFIELD 2000). The wild-type  
198 strain used was AB.

199

200 *Generation of mutant zebrafish lines*

201 Alt-R crRNA target sites were designed with Integrated DNA Technologies Alt-R CRISPR HDR  
202 Design Tool (<https://www.idtdna.com/pages/tools/alt-r-crispr-hdr-design-tool>). Alt-R CRISPR-  
203 Cas9 crRNA, tracrRNA (IDT, 1072532) and Alt-R S.p. Cas9 Nuclease V3 (IDT, 1081058) was  
204 prepared following manufacturer's instruction. 3  $\mu$ M sgRNA were obtained through diluting 100  
205  $\mu$ M crRNA and 100  $\mu$ M tracrRNA into Nuclease-Free Duplex Buffer (IDT 11-05-01-03), heating  
206 at 98°C for 5 min, then cooling to room temperature. The total sgRNA concentration was the same  
207 when one or three guides were used. 0.5  $\mu$ L Cas9 protein was diluted with Cas9 working buffer  
208 (20 mM HEPES; 150 mM KCl, pH7.5) to yield a working concentration of 0.5  $\mu$ g/ $\mu$ L. The diluted  
209 Cas9 protein working solution was mixed 1:1 with 3  $\mu$ M sgRNA solution and then incubated at  
210 37 °C for 10 min to obtain RNP complex. Microinjection was performed by injecting ~1 nL of  
211 RNP complex into yolk of 1-cell stage embryos. RNP complex was fresh prepared and left on ice  
212 until microinjection.

213

214 *Genotyping with High Resolution Melt (HRM) Analysis in Zebrafish*

215 To isolate genomic DNA from adults, tail clippings from each fish were incubated at 98°C for 20  
216 min in 40  $\mu$ l 25 mM NaOH in a 96-well plate; then neutralized with 40  $\mu$ l of 40 mM Tris-HCl.  
217 Early-stage or stained embryos were incubated at 55°C for 2 h in 25  $\mu$ l ELB (10 mM Tris pH 8.3,  
218 50 mM KCl, 0.3% Tween 20, 0.3% NP40, 1 mg/ml Proteinase K) in 96-well plates; then incubated  
219 at 95°C for 15 min to inactivate the Proteinase K. PCR reactions contained 1  $\mu$ l of LC Green Plus  
220 Melting Dye (Biofire Defense, BCHM-ASY-0005), 1  $\mu$ l of 10x enzyme buffer, 0.2  $\mu$ l of dNTP  
221 Mixture (10 mM each), 0.3  $\mu$ l of MgCl<sub>2</sub>, 0.3  $\mu$ l of each primer (10  $\mu$ M), 1  $\mu$ l of genomic DNA,  
222 0.05  $\mu$ l of Genscript Taq (E00101), and water up to 10  $\mu$ l. The PCR reaction protocol was 98°C

223 for 30 sec, then 45 cycles of 98°C for 10 sec, 59°C for 20 sec, and 72°C for 15 sec, followed by  
224 95°C for 30 sec and then rapid cooling to 4°C. Following PCR, melting curves were generated and  
225 analyzed using the LightScanner instrument (Idaho Technology) over a 65-95°C range.

226

#### 227 *Micro-computed tomography ( $\mu$ CT) on Zebrafish*

228  $\mu$ CT imaging was performed using the Scanco  $\mu$ CT 40 at a resolution of 16  $\mu$ m voxels. Contrast  
229 enhancement was achieved using Lugol's iodine solution (Sigma, L6146-1L).

230

#### 231 *Zebrafish Histology*

232 Zebrafish were paraffin embedded and histological analyses were performed as described  
233 previously (LABONTY *et al.* 2017). The fixation procedure was modified such that 6-month-old  
234 adult zebrafish were fixed in 4% paraformaldehyde overnight at room temperature.

235

#### 236 *Mice*

237 All animal studies were conducted in compliance with the National Institutes of Health *Guide for*  
238 *the Care and Use of Laboratory Animals* and approved by the Institutional Animal Care and Use  
239 Committee at the University of Alabama at Birmingham. Mice were maintained on LabDiet® JL  
240 Rat and Mouse/Irr 10F 5LG5 chow.

241

#### 242 *Mouse Embryo Isolation*

243 Timed pregnancies were established with embryonic time-point of E0.5 being noted as noon on  
244 the morning of observing the copulatory plug. To isolate embryos, pregnant females were

245 anesthetized using isoflurane followed by cervical dislocation. Embryonic tissues or whole  
246 embryos were isolated and fixed in 4% paraformaldehyde (Sigma PFA, 158127) in PBS.

247

#### 248 *Immunofluorescence microscopy on mouse tissue sections*

249 Ten (10)  $\mu\text{m}$  thick tissue cryosections were used for immunofluorescence microscopy. Sections  
250 were fixed with 4% PFA for 10 minutes, permeabilized with 0.1% Triton X-100 in PBS for 8  
251 minutes and then blocked in a PBS solution containing 1% BSA, 0.3% TritonX-100, 2% (vol/vol)  
252 normal donkey serum and 0.02% sodium azide for one hour at room temperature. Primary antibody  
253 incubation was performed in blocking solution overnight at 4°C. Primary antibodies include anti-  
254 acetylated  $\alpha$ -tubulin (Sigma, T7451) direct conjugated to Alexa 647 (Invitrogen, A20186) and used  
255 at 1:1000, anti-Arl13b (Proteintech, 1771-1AP, 1:500). Cryosections were then washed with PBS  
256 three times for five minutes at room temperature. Secondary antibodies, donkey anti-rabbit  
257 conjugated Alexa Fluor 594 (Invitrogen, 1:1000), diluted in blocking solution were added for one  
258 hour at room temperature. Samples were washed in PBS and stained with Hoechst 33258 (Sigma-  
259 Aldrich) for five minutes at room temperature. Cover slips were mounted using Immu-Mount  
260 (Thermo Fisher Scientific). Fluorescence images were captured on Nikon Spinning-disk confocal  
261 microscope with Yokogawa X1 disk, using a Hamamatsu flash4 sCMOS camera. 60x apo-TIRF  
262 (NA=1.49) or 20x Plan Flour Multi-immersion (NA=0.8) objectives were used. Images were  
263 processed using Nikon's Elements or Fiji software.

264

#### 265 *Tamoxifen Administration in Mice*

266 Recombination of the *Bbs5*<sup>flox/flox</sup> allele was induced in juvenile *CAGG-cre*<sup>ERT2</sup> (Jax Mice stock#  
267 004682) positive mice at postnatal day 7 by a single intraperitoneal (IP) injection of 9 mg

268 tamoxifen (Millipore Sigma, T5648) per 40 g body weight. Tamoxifen was dissolved in sterile  
269 corn oil. Adult animals were induced at 8 weeks old by IP injections of 6 mg/40 g body weight  
270 tamoxifen, administered once daily for three consecutive days.

271

## 272 *Statistical Analyses*

273 For *C. elegans* chemotaxis and egg laying behavioral assays, we used a two-way ANOVA with  
274 multiple comparisons to identify statistically significant data points. For brood size and egg  
275 retention counts, we used a one-way ANOVA with multiple comparisons. Analyses were  
276 performed with GraphPad Prism 9 (GraphPad Software, LLC, San Diego, CA).

277

## 278 **Results**

### 279 *Amphid dye-filling is disrupted in C. elegans bbs-5;nphp-4 double mutants*

280 Previously, we conducted a large-scale modifier screen in *C. elegans* to identify genetic  
281 interactions able to exacerbate cilia related phenotypes caused by a null mutation in the transition  
282 zone component *nphp-4* (WINKELBAUER *et al.* 2005; MASYUKOVA *et al.* 2016). From this screen,  
283 ten independent strains were isolated, each showing more severe dye-filling defects than *nphp-*  
284 *4(tm925)* mutants alone. Subsequent analysis identified a novel allele in the BBSome complex  
285 member, *bbs-5*, in one of the strains from the screen. The *bbs-5(yhw62)* allele is a single nucleotide  
286 mutation that results in a tryptophan to stop codon transition in the third exon of the gene (**Figure**  
287 **1A**).

288 Both N2 and *nphp-4(tm925)* worms show normal dye-filling in both the amphid and  
289 phasmid sensory neurons (**Figure 1B, quantified in 1C and 1D**). Similarly, the *bbs-5* mutant line  
290 obtained from the screen, *bbs-5(yhw62)*, displayed normal dye-filling in the amphid neurons. In

291 contrast, phasmid neurons in most (65%) *bbs-5(yhw62)* animals were dye-filling defective (Dyf).  
292 When the *nphp-4(tm925)* mutation was combined with *bbs-5(yhw62)* it resulted in significant dye-  
293 filling defects, with 87% and 95.3% of animals showing dye-filling defects in the amphids and  
294 phasmids, respectively. Collectively, these data provide support for a genetic interaction between  
295 *nphp-4* and *bbs-5* in *C. elegans*.

296 Additional alleles in the *bbs-5* gene, *bbs-5(gk537)* and *bbs-5(gk507)* have previously been  
297 reported, and we compared them with the new allele obtained from the screen. Both the *bbs-*  
298 *5(gk537)* and *bbs-5(gk507)* alleles contain large deletions spanning the putative promoter, the 5'  
299 untranslated region (5'UTR), and the first and second exons (**Supplemental Figure 1A**). *bbs-*  
300 *5(gk537)* and *bbs-5(gk507)* single mutant animals exhibit normal dye-filling in both the amphid  
301 and phasmid neurons (**Supplemental Figure 1B, quantified in 1C**). Double mutant animals  
302 harboring either deletion allele display a partial dye-filling defect of their amphid neurons (60.7%  
303 in *bbs-5(gk537);nphp-4(tm925)* and 67% in *bbs-5(gk507);nphp-4(tm925)*). A majority of *bbs-*  
304 *5(gk537);nphp-4(tm925)* animals show dye-filling defects in the phasmid neurons (72.2%), while  
305 most of the *bbs-5(gk507);nphp-4(tm925)* animals display normal phasmid dye-filling (55.2%).

306 The location of the deletions paired with the differences between these alleles and the  
307 newly generated *bbs-5(yhw62)* allele led us to investigate whether the *bbs-5(gk507)* and *bbs-*  
308 *5(gk537)* are likely to retain some expression and function, perhaps due to the presence of alternate  
309 *bbs-5* transcripts. To determine whether any transcript is being made in the *bbs-5(gk507)* and *bbs-*  
310 *5(gk537)* alleles, despite deletion of all predicted promoter sequences, we designed primers  
311 downstream of the deletion region (exon 3 to exon 5). The resulting rtPCR generated distinct bands  
312 at the predicted size in *bbs-5(gk507)*, *bbs-5(gk537)*, and *bbs-5(yhw62)* alleles (**Supplemental**  
313 **Figure 1D**), suggesting that there is an alternate transcript of *bbs-5*. Importantly, the *bbs-5(yhw62)*

314 alternate transcript still contains an early stop codon in exon 3 that would yield a very short and  
315 likely non-functional protein product. The expression of alternate transcripts in the *bbs-5(gk507)*  
316 and *bbs-5(gk537)* mutants likely explains the differences in phenotypes observed and suggests that  
317 these alleles are hypomorphic, while the *bbs-5(yhw62)* allele is a likely null mutation.

318         Since the *bbs-5(gk507)* and *bbs-5(gk537)* alleles include a portion of the 3'UTR of the  
319 upstream R01H10.7 gene, we performed rtPCR to determine if a read-through transcript was  
320 generated. We only detected a minimal amount of possible readthrough transcription in *bbs-*  
321 *5(gk507)*, which is likely degraded due to nonsense mediated decay (**Supplemental figure 1D**).

322

323 *Sensory neuron-mediated behaviors are differentially affected by bbs-5 and nphp-4 mutant alleles*

324         Many *C. elegans* behaviors, including chemosensation, dauer formation, and egg laying,  
325 have been connected to the proper development and function of the ciliated sensory neurons  
326 (WARD 1973; ALBERT *et al.* 1981; GOLDEN AND RIDDLE 1982; BARGMANN 1993; WINKELBAUER  
327 *et al.* 2005; LEE AND PORTMAN 2007). Given the prominent role of cilia in these behaviors we  
328 assessed whether any sensory neuron-mediated behaviors might be impacted by the *bbs-5* or *nphp-*  
329 *4* alleles, and whether any behavioral impairments might be exacerbated by the presence of both  
330 alleles. First, we assessed chemotaxis to four different attractive compounds: diacetyl and  
331 pyrazine, which are recognized by the AWA neurons, as well as benzaldehyde and 2,3-  
332 pentanedione, which are recognized by the AWC neurons (BARGMANN 1993). For all four  
333 odorants, N2 controls yielded an average chemotaxis index (CI) between 0.74 and 0.86, indicative  
334 of animals that can detect and preferentially move towards an attractive compound (**Figure 2A**).  
335 In contrast, both *nphp-4(tm925)* and *bbs-5(yhw62)* worms show a significant deficiency in  
336 chemotaxis, with average CI values between 0.36 and 0.48 for all four compounds. We did not see

337 any further chemotaxis deficiency in the *bbs-5(yhw62);nphp-4(tm925)* mutants (CI values between  
338 0.34 and 0.5). This suggests that the single mutant *nphp-4(tm925)* and *bbs-5(yhw62)* animals likely  
339 have complete loss of their chemotaxis abilities.

340 In contrast to the *bbs-5(yhw62)* allele, the two large deletion alleles (*bbs-5(gk507)* and *bbs-*  
341 *5(gk537)*) did not show any significant deficiency in chemotaxis (CI values between 0.7 and 0.79)  
342 in the AWA neurons (**Supplemental Figure 2A**). Interestingly, the *bbs-5(gk537)* mutation was  
343 able to rescue the chemotaxis defects caused the *nphp-4(tm925)* allele in double mutants (CI values  
344 between 0.62 and 0.72) specifically for AWA neuron detected compounds, but not the AWC-  
345 detected odorants. In contrast, the single *bbs-5(gk507)* worms displayed chemotaxis defects  
346 specifically to the two AWC-detected odorants, (CI values between 0.27 and 0.62 for  
347 benzaldehyde; CI values between 0.22 and 0.71 for 2,3-pentanedione). *bbs-5(gk507);nphp-*  
348 *4(tm925)* double mutants exhibited chemotaxis defects to all four compounds, though CI values  
349 ranged widely from 0.16 to 0.82.

350 Next, we determined whether each strain could enter the dauer stage in response to  
351 starvation conditions, another phenotype requiring cilia function (SCHAFER *et al.* 2006). The N2  
352 control worms and each of the single mutant lines, *nphp-4(tm925)*, *bbs-5(yhw62)*, *bbs-5(gk537)*  
353 and *bbs-5(gk507)*, survive SDS treatment, indicating an ability to properly form dauers (**Figure**  
354 **2B, Supplemental Figure 2B**). In contrast, all the double mutant lines did not survive SDS  
355 treatment, suggesting that the genetic interaction between any *bbs-5* allele and *nphp-4* eliminates  
356 the ability to form dauers.

357 Prompted by the observation that we saw few unhatched, fertilized embryos on plates with  
358 *bbs-5(yhw62)* worms (**Figure 2E**), we analyzed the strains for possible defects in egg laying, egg  
359 retention, and total brood size. To address egg laying and total brood size, we age-synchronized



360 hermaphrodites from N2, *bbs-5(yhw62)*, and *nphp-4(tm925);bbs-5(yhw62)* double mutants and  
361 counted the number of eggs laid in 24-hour time intervals over four days after the L4 stage. Brood  
362 size was determined by summing the total number of eggs laid over the four-day period. The *bbs-*  
363 *5(yhw62)* mutants showed a delay in egg laying over the first 48 hours (**Figure 2C, Supplemental**  
364 **Figure 2C**) and a significant decrease in total brood size (n=148 eggs, p<0.0001) when compared  
365 to the remaining strains, including N2 controls (n=247 eggs, **Figure 2D, Supplemental Figure**  
366 **2D**). Surprisingly, the phenotypes observed in *bbs-5(yhw62)* mutants were rescued in *nphp-*  
367 *4(tm925);bbs-5(yhw62)* double mutants. In contrast to the *bbs-5(yhw62)* mutants, brood size in  
368 *bbs-5(gk507)* and *bbs-5(gk537)* strains and their corresponding double mutants were not  
369 significantly different than controls or *nphp-4(tm925)* single mutants (**Supplemental Figure 2D**).  
370 Although there was some variation across timepoints, overall, none of the strains differed  
371 significantly from N2 controls during the final time interval.

372 We reasoned that the lack of embryos laid in the first 24 hour period and overall delayed  
373 egg laying in the *bbs-5(yhw62)* worms could be a result of egg retention (**Figure 2E,**  
374 **Supplemental Figure 2E**; eggs pseudocolored blue). To test this, we quantified the number of  
375 fertilized embryos that were retained in the uterus of age-synchronized young adults. N2 control  
376 animals had an average of nine eggs retained in the uterus (**Figure 2F**). The number of eggs  
377 retained by *nphp-4(tm925)*, *bbs-5(gk537)*, *bbs-5(gk507)* *bbs-5(gk537);nphp-4(tm925)*, and *bbs-*  
378 *5(gk507);nphp-4(tm925)* animals was not significantly different from N2 controls (**Figure 2F**  
379 **Supplemental Figure 2F**). In contrast, *bbs-5(yhw62)* animals retained more than three times as  
380 many eggs, with an average of 31 eggs per animal (p<0.0001). Addition of *nphp-4(tm925)* in the  
381 *bbs-5(yhw62)* background partially rescued this defect, with animals retaining an average of 21  
382 eggs in the uterus.

383

384 *BBS-5 and NPHP-4 are individually necessary for transition zone integrity*

385         Given that NPHP-4 is a component of the transition zone, which functions as a barrier  
386 between the cilium and the rest of the cell, and BBS-5 is a component of the BBSome that mediates  
387 both entry and removal of membrane associated proteins from the cilium, we wondered whether  
388 there were changes in trafficking of ciliary or non-ciliary proteins in the sensory neurons that may  
389 be related to the phenotypic differences observed in the single versus double mutants. We first  
390 analyzed RPI-2, a GTPase activator that is normally localized in a region just outside of the  
391 primary cilium called the periciliary membrane (BLACQUE *et al.* 2005; WILLIAMS *et al.* 2011)  
392 (**Figure 3A**). When the integrity of the transition zone is disrupted, RPI-2 localization can be seen  
393 inside the ciliary compartment (WILLIAMS *et al.* 2011). We replicated this result in *nphp-4(tm925)*  
394 animals (**Figure 3A**). Interestingly, we also see RPI-2 expression inside the cilium in both *bbs-*  
395 *5(yhw62)* and *bbs-5(gk537)* mutants analyzed indicating that loss of BBS-5 alone results in  
396 improper localization of non-ciliary membrane proteins into the cilium (**Figure 3A, Supplemental**  
397 **Figure 3A**). Analysis of the double mutants revealed no overt differences in the RPI-2::GFP  
398 localization pattern or level of accumulation in the cilium compared to single mutants.

399         As we saw defects in chemotaxis toward diacetyl in both the *nphp-4(tm925)* and *bbs-*  
400 *5(yhw62)* backgrounds (**Figure 2A**), we also analyzed whether there are changes in the localization  
401 of ODR-10::GFP, the G-protein coupled receptor for diacetyl. ODR-10 is expressed solely in the  
402 AWA neurons (SENGUPTA AND BARGMANN 1996). In N2 controls, ODR-10::GFP uniformly fills  
403 the wing-shaped AWA cilia (**Figure 3B**). None of the strains carrying mutations in either *nphp-4*  
404 or *bbs-5* showed any discernable differences in the localization of ODR-10::GFP (**Figure 3B,**  
405 **Supplemental Figure 3B**). Furthermore, analysis via Fluorescence Recovery after

406 Photobleaching (FRAP) showed that the trafficking within the cilium is not affected in any of the  
407 strains analyzed (**Supplemental Figure 4**). These data suggest that the chemotaxis defects toward  
408 diacetyl observed in the *bbs-5(yhw62)*, *nphp-4(tm925)*, and double mutant strains is not due to loss  
409 of the receptor in the cilium but likely a result of disruption of signal transduction downstream of  
410 ODR-10.

411  
412 *Bbs5;Nphp4* double mutant zebrafish do not display exacerbated phenotypes compared to single  
413 mutant fish.

414 To investigate whether the genetic interactions between *nphp4* and *bbs5* alleles detected in our *C.*  
415 *elegans* model are evolutionarily conserved, we generated *Nphp4* and *Bbs5* mutant zebrafish using  
416 CRISPR/Cas9. The *Nphp4* mutant zebrafish allele (*Nphp4<sup>d7/d7</sup>*) contains a 7 base pair deletion  
417 (TGCACCC) at amino acid 163 (exon 4) resulting in a frameshift. The *Bbs5* mutant zebrafish  
418 allele (*Bbs5<sup>+5/+5</sup>*) contains a 6 base pair deletion (CTCTGG) with an insertion of 11 base pairs  
419 (AGACAGAGACA) causing a +5 insertion and frameshift at amino acid 8 (exon 1) (**Figure 4A**).  
420 *Bbs5<sup>+5/+5</sup>* mutant zebrafish display severe scoliotic curvature of the spine (**Figure 4B**).  
421 Unexpectedly, no discernable phenotypes were detected in *Nphp4* mutant fish. We then generated  
422 *Nphp4<sup>d7/d7</sup>;Bbs5<sup>+5/+5</sup>* double mutant fish. In contrast to the data in *C. elegans*, the addition of the  
423 *Nphp4<sup>d7/d7</sup>* mutation did not exacerbate the scoliotic phenotype nor did it present with new  
424 phenotypes that are not present in the *Bbs5<sup>+5/+5</sup>* mutant alone. Histological analysis did not reveal  
425 gross morphological abnormalities in the vertebrae or vertebral discs in *Bbs5<sup>+5/+5</sup>* and  
426 *Nphp4<sup>d7/d7</sup>;Bbs5<sup>+5/+5</sup>* mutant fish (**Figure 4C**). Similarly, no overt differences were noted by  
427 histological analysis of the kidney or heart in *Nphp4<sup>d7/d7</sup>*, *Bbs5<sup>+5/+5</sup>*, and *Nphp4<sup>d7/d7</sup>;Bbs5<sup>+5/+5</sup>*  
428 mutant zebrafish (**Figure 4C**). Histological analysis of the retina indicates that organization of the

429 outer nuclear layer (ONL) is disrupted in *Bbs5*<sup>+5/+5</sup> mutant fish and is not exacerbated in  
430 *Nphp4*<sup>d7/d7</sup>;*Bbs5*<sup>+5/+5</sup> mutant fish (**Figure 4C**).

431

432 *Bbs5*<sup>-/-</sup>;*Nphp4*<sup>-/-</sup> congenital mutant mice do not survive to weaning age

433 To determine if genetic interactions between *Nphp4* and *Bbs5* mutations are conserved in  
434 a mammalian model, we generated *Nphp4*;*Bbs5* double mutant mice (allele maps, **Figure 5A and**  
435 **5B**). It has previously been reported that male *Nphp4*<sup>-/-</sup> mice are sterile due to sperm motility  
436 defects (WON *et al.* 2011). Similarly, we previously described sterility defects and sub-mendelian  
437 ratios at birth and weaning in congenital *Bbs5*<sup>-/-</sup> animals (BALES *et al.* 2020; BENTLEY-FORD *et al.*  
438 2021). For this reason, double heterozygous *Bbs5*<sup>-/+</sup>;*Nphp4*<sup>-/+</sup> female by *Bbs5*<sup>-/+</sup>;*Nphp4*<sup>-/+</sup> male  
439 matings were established. Embryos isolated from these crosses show no outward defects at E16.5.  
440 Analysis of embryos by contrast-enhanced microcomputed tomography ( $\mu$ CT) similarly showed  
441 no obvious defects in tissue morphology including left-right body axis patterning, heart structure,  
442 lung, and kidney morphology (**Figure 5C**). Furthermore, cilia are present in the lateral plate  
443 mesoderm of double mutants (**Figure 5D**). Despite the presence of cilia and the lack of obvious  
444 morphological differences between wild-type and double mutant animals, *Bbs5*<sup>-/-</sup>;*Nphp4*<sup>-/-</sup> mice do  
445 not survive until weaning age (**Figure 5E**) ( $\chi^2(8, N=103) = 37.4, p < 0.001$ ). Interestingly, there is  
446 also a significant decrease in the number of *Bbs5*<sup>-/+</sup>;*Nphp4*<sup>-/+</sup> and *Bbs5*<sup>-/+</sup>;*Nphp4*<sup>-/-</sup> animals, further  
447 indicating a genetic interaction between the TZ component, *Nphp4*, and BBSome component, *Bbs5*  
448 that compromises viability.

449

450 *Loss of BBS5 in a congenital Nphp4*<sup>-/-</sup> mutant background results in neurological abnormalities  
451 *and lethality*

452 To test for genetic interactions between alleles of *Nphp4* and *Bbs5* postnatally, we utilized  
453 the conditional *Bbs5* allele (*Bbs5<sup>lox/lox</sup>*) crossed onto *Cagg-Cre<sup>ERT</sup>*, *Nphp4<sup>+/-</sup>* and *Nphp4<sup>-/-</sup>* mutant  
454 backgrounds. Recombination of *Bbs5<sup>ff</sup>* was induced by IP injection of tamoxifen. When induced  
455 at seven days following birth (P7), *Bbs5<sup>ΔΔ</sup>* (N=7) and *Nphp4<sup>-/-</sup>* (N=4) single mutant animals  
456 survived at rates comparable to wild-type (N=7) animals. Comparatively, there is a significant  
457 increase in lethality in *Bbs5<sup>ΔΔ</sup>;Nphp4<sup>-/-</sup>* double mutant animals (80%, N=5) within 20 days  
458 following induction. A similar effect is seen in *Bbs5<sup>ΔΔ</sup>;Nphp4<sup>+/-</sup>* animals (50%, N=6). These data  
459 further support a strong genetic interaction between *Bbs5* and *Nphp4* alleles (**Figure 5F**).  
460 *Bbs5<sup>ΔΔ</sup>;Nphp4<sup>-/-</sup>* animals frequently exhibited uncoordinated behaviors and seizure-like activity  
461 (**Supplemental Video 1**). At the time of death, *Bbs5<sup>ΔΔ</sup>;Nphp4<sup>-/-</sup>* and *Bbs5<sup>ΔΔ</sup>;Nphp4<sup>+/-</sup>* animals  
462 appear runted compared to littermates. The cause of lethality following induction is not known. In  
463 contrast to the result obtained with mice induced at P7, animals that are induced at eight weeks of  
464 age appear normal and do not express characteristics more severe than either single mutant animals  
465 (data not shown). Collectively, these data indicate the genetic interactions between the alleles is  
466 important during development and perinatal periods but not in adults.

467

## 468 Discussion

469 Using a forward genetic modifier screen, we identify genetic interactions between the  
470 ciliary TZ component *nphp-4* and the BBSome component *bbs-5* in *C. elegans*. This interaction  
471 was identified via severe dye-filling defects that are present in *bbs-5(yhw62);nphp-4(tm925)*  
472 double mutant animals compared to *bbs-5(yhw62)* and *nphp-4(tm925)* single mutants individually.  
473 Additional large deletion alleles that include the 5' end of the *bbs-5* gene, *bbs-5(gk537)* and *bbs-*  
474 *5(gk507)*, were also analyzed. Genetic interactions between *bbs-5(gk507)* and *nphp-4(tm925)* have

475 been previously reported to cause an exacerbated phenotype (YEE *et al.* 2015). However, we show  
476 that the *bbs-5(yhw62)* allele identified in our screen displays more severe phenotypes when  
477 compared to the *bbs-5(gk537)* and *bbs-5(gk507)* alleles by themselves and when combined with  
478 the *nphp-4(tm925)* allele.

479         The enhanced severity of phenotypes seen with the *bbs-5(yhw62)* allele when compared to  
480 the two deletion alleles led us to investigate whether they may retain some function despite the  
481 loss of the putative promoter. Our data suggests that both deletion alleles are still able to generate  
482 a shorter transcript despite having lost their promoter region. Upon evaluation of the *bbs-5* gene,  
483 we identified the presence of an in-frame methionine residue at the beginning of exon 3 (**Figure**  
484 **1A, Supplemental Figure 1A**) as well as an SL1 trans-splice leader sequence and several putative  
485 transcription factor binding sites suggesting a separate promoter element for generation of an  
486 alternative transcript that is predicted to begin at exon 3. These elements are all present in intron  
487 2, which is an uncharacteristically large (1,156 bp) intron for *C. elegans*. The location of the *bbs-*  
488 *5(yhw62)* mutation would still result in an in-frame nonsense mutation within the alternative  
489 transcript supporting the conclusion that it is the most severe *bbs-5* mutant allele studied to date,  
490 if not the only null allele studied.

491         Furthermore, when we assayed chemosensing abilities we note that the two large deletion  
492 alleles (*bbs-5(gk537)* and *bbs-5(gk507)*) are more phenotypically similar to each other compared  
493 to the *bbs-5(yhw62)* allele. An exception to this is observed specifically within the AWC neurons.  
494 In these neurons we observe chemosensing defects in the *bbs-5(gk507)* mutants alone compared  
495 to the *bbs-5(gk537)* mutants. We predict that this variability also stems from the location of the  
496 deletions found in these alleles. The transcription factor binding region located in intron 2 includes  
497 predicted binding sites for HPL-2, which has been shown to regulate odor adaption specifically in

498 the AWC sensory neurons (JUANG *et al.* 2013). The deletion mutation in the *bbs-5(gk507)* allele  
499 ablates the entire HPL-2 binding region compared to the *bbs-5(gk537)* deletion, which only  
500 disrupts part of the region. This could effectively explain why we see loss of AWC-specific  
501 chemotaxis behavior only in the *bbs-5(gk507)* allele. Interestingly, this region is conserved across  
502 worms, mice, and humans.

503 Assays investigating egg laying, the number of eggs retained in the uterus, and brood size  
504 also show a defect in *bbs-5(yhw62)* animals alone. Surprisingly, we see a partial rescue of these  
505 defects when the *bbs-5(yhw62)* allele is combined with the *nphp-4(tm925)* allele; the mechanisms  
506 involved in this partial rescue are not known. Regarding egg laying behaviors, *bbs-5(gk507)* single  
507 and *bbs-5(gk507);nphp-4(tm925)* double mutants exhibit moderate delays in the temporal pattern  
508 of egg laying. Unlike the results for the *bbs-5(yhw62)* animals, this delay in the *bbs-5(gk507)*  
509 animals is not caused by egg retention, nor does it result in a decreased total brood size.

510 Interestingly, the only behavior that mirrored the exacerbated dye-filling defects seen in all  
511 double mutant animals is the ability to form dauers. These results raise a question regarding dye-  
512 filling and what it tells us about ciliated sensory neurons. Each of the performed assays are  
513 commonly accepted for evaluation of ciliary structure and function in *C. elegans*. The variability  
514 seen in double mutant animals between behavioral defects suggests that dye-filling is a readout of  
515 a process that is independent of chemosensing ability or transition zone integrity but may be linked  
516 to dauer formation. While we do not show disruption of ciliary membrane receptor trafficking  
517 based on ODR-10 localization, we do note transition zone integrity abnormalities based on RPI-  
518 2::GFP localization. Because these defects are observed in our single mutant animals by  
519 themselves, it is not possible to determine whether this is exacerbated in double mutant strains. It

520 is likely that disruption of events downstream of ciliary trafficking in double mutant strains is  
521 driving the phenotypes observed.

522 To determine whether these interactions are conserved across species, *Nphp4* and *Bbs5*  
523 mutant zebrafish were generated using CRISPR/Cas9. While *Bbs5* mutant zebrafish exhibit severe  
524 scoliotic curvature of the spine and defects in the ONL of the retina, *Nphp4* mutant zebrafish did  
525 not exhibit any overt phenotypes. The lack of phenotypes in *Nphp4* fish is surprising considering  
526 the effect of mutations in *Nphp4* in mouse models and in human patients, and the important role it  
527 has in forming the NPHP complex in the TZ of *C. elegans*. It is possible that *Nphp4* may not be as  
528 functionally important in fish or that it preferentially impacts primary cilia compared to motile  
529 cilia. Many of the zebrafish ciliopathy phenotypes are associated with defects in motile cilia.  
530 Alternatively, it is possible that *Nphp4* mutant zebrafish do develop subtle phenotypes that were  
531 simply not detected with the analysis methods employed here or neurological phenotypes that were  
532 not analyzed. When combined, *Nphp4;Bbs5* double mutant zebrafish are viable and do not exhibit  
533 additional phenotypes when compared to *Bbs5* mutants alone, which is in direct contrast to what  
534 we find in the *C. elegans* and mouse models. The lack of observable phenotypes in the *Nphp4*  
535 zebrafish makes interpretation of whether a genetic interaction between the alleles is occurring in  
536 the double mutant fish challenging.

537 Previously, we described a congenic mouse model with a mutated *Bbs5* allele (BENTLEY-  
538 FORD *et al.* 2021) and crossed this allele with the *Nphp4* mutant mouse (WON *et al.* 2011) to test  
539 whether the genetic interaction occurs in a mammalian model. While mice with either mutation  
540 alone are viable, no double mutant animals were obtained at weaning age. More significantly  
541 regarding demonstrating a genetic interaction between the alleles, we observed significantly fewer  
542 mice that are homozygous for one allele and heterozygous for the other than would be expected.



543 Analysis of embryos at E16.5 revealed that *Nphp4*<sup>-/-</sup>;*Bbs5*<sup>-/-</sup> mutant embryos appear  
544 morphologically normal and that cilia are still present. Thus, the exacerbated phenotypes are not  
545 due to defects in ciliogenesis. As we have previously reported, abnormal splicing events in the  
546 *Bbs5*<sup>-/-</sup> congenital mouse model causes aberrant tissue specific splicing from the mutant allele, with  
547 some tissues able to maintain normal splicing to generate the normal coding region. Due to the  
548 complex splicing in the congenital model, we utilized a conditional allele of *Bbs5* crossed with the  
549 *Nphp4* allele. Using the inducible Cagg-Cre<sup>ERT</sup>, we were able to induce the loss of BBS5 on the  
550 *Nphp4* congenital mutant background. When loss of BBS5 is induced in *Nphp4* mutant juvenile  
551 mice (P7), animals frequently exhibit seizures or ataxia, the latter of which could be related to  
552 defects in the cerebellum. Induction of BBS5 loss in adult animals (8 weeks old) does not have  
553 this effect, supporting a neurodevelopmental consequence caused by combined loss of the *Bbs5*  
554 and *Nphp4*. This also points to defects in function of the cerebellum as its maturation occurs during  
555 the perinatal period (CHIZHIKOV *et al.* 2007); although we do not observe any overt morphological  
556 defects in the cerebellum of the double mutants.

557 Collectively, our results demonstrate an importance for *bbs-5*, and possibly the BBSome,  
558 in interacting with *nphp-4* and the transition zone to regulate ciliary signaling. Future work will  
559 aim to identify the disrupted downstream signaling cascades that are responsible for the variety of  
560 behavioral phenotypes observed in both *C. elegans* and mice. These data also help address possible  
561 mechanisms involved in the phenotypic variability observed in human ciliopathy patients with  
562 disease severity being dictated by the overall mutational load in ciliopathy genes that occur in the  
563 patients' genetic backgrounds.

564

565 **Data Availability Statement**

566 Strains and plasmids are available upon request. Sequence data is available through GenBank.

567

568 **Acknowledgements**

569 We would like to thank the members of Dr. Bradley K. Yoder's and Dr. John M. Parant's  
570 laboratories for intellectual and technical support on the project. We would like to thank Dr. Maria  
571 S. Johnson and Dr. Timothy R. Nagy in the Small Animal Phenotyping sub-core at the University  
572 of Alabama at Birmingham for conducting the  $\mu$ CT analysis.

573

574 **Funding**

575 We would like to thank the National Institute of Diabetes and Digestive and Kidney Diseases and  
576 the National Heart, Lung, and Blood Institute for financial support of these studies. This work was  
577 supported by National Institutes of Health [2R01DK065655, 1U54DK126087, and  
578 3P30DK074038 to BKY, 1R21OD030065 to JMP, F31HL150898 and 5T32HL007918-20 to  
579 MRB, 5K12GM088010-12 to ML]. Some *C. elegans* strains were provided by the Caenorhabditis  
580 Genetics Center (CGC), which is funded by NIH Office of Research Infrastructure Programs (P40  
581 OD010440).

582

Figure legends

583 **Figure 1. A forward mutagenesis screen identifies genetic interactions between *nphp-4* and**

584 ***bbs-5* alleles.** A) Allele maps of *bbs-5(yhw62)* and *nphp-4(tm925)*. 'M' indicates in-frame

585 methionine residue at the beginning of exon 3. B) Dil dye filling of amphid (top) and phasmid

586 (bottom) neurons in *C. elegans*. Percentages indicate frequency of most common dye filling

587 phenotype (see methods for details). C) Quantification of Normal, Partial Dyf, and Dyf

588 phenotypes in amphid (top panels) and phasmid (bottom panels) neurons. N values represent  
589 total number of animals analyzed. Dyf, dye filling defective.

590

591 **Figure 2. Genetic interaction between *nphp-4* and *bbs-5* alleles alters ciliated sensory**

592 **neuron-mediated behaviors.** A) Chemotaxis to attractive compounds recognized by the AWA

593 neurons (diacetyl and pyrazine) or AWC neurons (benzaldehyde or 2,3-pentanedione) was

594 measured, generating a Chemotaxis index (CI).  $n \geq 50$  animals per strain, for at least six replicate

595 experiments. \* indicates  $p < 0.05$  when compared to N2 control. B) Assessment of ability to form

596 dauer-stage animals. N = 4 replicate experiments. C) Number of eggs laid during 24-hour

597 intervals following L4 stage.  $n \geq 6$  animals per strain. D) Total number of eggs laid during the

598 course of adulthood.  $n \geq 6$  animals per strain. \*\*\*\* indicates  $p < 0.0001$ . E) Visualization of eggs

599 laid in first 24 hours following L4 stage. Each individual egg is pseudo-colored in blue. Scale bar

600 is 1 mm. F) Measurement of eggs retained in the uterus of adults 24 hours following L4 stage.  $n$

601 = 20 animals per strain. Total number of eggs laid during the course of adulthood.  $n \geq 6$  animals

602 per strain. (Average eggs per strain over time N2: 64 eggs from 48-72 hours, 147 eggs from 72-

603 96 hours, 32 eggs from 96-120 hours, and 4 eggs from 120-144 hours. *nphp-4(tm925)*: 70 eggs

604 from 48-72 hours, 133 eggs from 72-96 hours, 30 eggs from 96-120 hours, and 8 eggs from 120-

605 144 hours. *bbs-5(yhw62)*: 16 eggs from 48-72 hours, 86 eggs from 72-96 hours, 36 eggs from

606 96-120 hours, and 11 eggs from 120-144 hours. *nphp-4(tm925);bbs-5(yhw62)* 48 eggs from 48-

607 72 hours, 116 eggs from 72-96 hours, 63 eggs from 96-120 hours, and 13 eggs from 120-144

608 hours.) \*\*\* indicates  $p < 0.001$ , \*\*\*\* indicates  $p < 0.0001$ . Error bars in this figure represent

609 standard deviation.

610

611 **Figure 3. Localization of ciliary ODR-10 and nonciliary RPI-2 membrane proteins is not**  
612 **affected by genetic interaction between *nphp-4* and *bbs-5*.** A) RPI-2::GFP protein is excluded  
613 from the cilium in N2 worms but enters the cilium in *nphp-4(tm925)*, *bbs-5(yhw62)*, and *bbs-*  
614 *5(yhw62);nphp-4(tm925)* mutants. Data is shown for the phasmid sensilla. B) ODR-10::GFP  
615 protein is present in the cilium compartment of AWA amphid neuron of *nphp-4(tm925)*, *bbs-*  
616 *5(yhw62)*, and *bbs-5(yhw62);nphp-4(tm925)* mutants. Representative images selected from  
617 among at least 5 animals.

618  
619 **Figure 4. Generation of *bbs5* and *nphp4* mutant zebrafish.** A) Allele map of *Bbs5*<sup>+5/+5</sup> and  
620 *Nphp4*<sup>d7/d7</sup> mutant zebrafish. B) Micro-Commuted Tomography (uCT) of control, *Nphp4*<sup>d7/d7</sup>,  
621 *Bbs5*<sup>+5/+5</sup>, and *Bbs5*<sup>+5/+5</sup>;*Nphp4*<sup>d7/d7</sup> mutant zebrafish. C) H&E analysis of vertebra, kidney, heart  
622 and eye in control, *Nphp4*<sup>d7/d7</sup>, *Bbs5*<sup>+5/+5</sup>, and *Bbs5*<sup>+5/+5</sup>;*Nphp4*<sup>d7/d7</sup> mutant zebrafish. Pigmented  
623 Epithelium (PE), Photoreceptors (PR), Outer Nuclear Layer (ONL), Inner Nuclear Layer (INL).

624  
625 **Figure 5. Effect of mutations in *Bbs5* and *Nphp4* mice.** A) Allele map of *Bbs5*<sup>tm1a</sup> (*Bbs5*<sup>-/-</sup>),  
626 *Bbs5*<sup>tm1c</sup> (*Bbs5*<sup>lox/lox</sup>), *Bbs5*<sup>tm1d</sup> (*Bbs5*<sup>Δ/Δ</sup>) B) Schematic depicting the *Nphp4*<sup>-</sup> allele. C) Contrast  
627 enhanced micro-commuted tomography of *Bbs5*<sup>+/+</sup>;*Nphp4*<sup>+/+</sup> and *Bbs5*<sup>Δ/-</sup>;*Nphp4*<sup>-/-</sup> embryos  
628 isolated at E18.5. D) Immunofluorescence staining for cilia (Arl13b, green) in the lateral plate  
629 mesoderm of *Bbs5*<sup>+/-</sup>;*Nphp4*<sup>+/+</sup> and *Bbs5*<sup>-/-</sup>;*Nphp4*<sup>-/-</sup> double mutant embryos. E) Expected versus  
630 observed frequencies of genotypes at weening age generated from a double heterozygous by  
631 double heterozygous mating. F) Kaplan-Meier survival curve of P7 induced mice utilizing the  
632 conditional *Bbs5* allele (*Bbs5*<sup>lox/lox</sup>) crossed onto *Cagg-Cre*<sup>ERT</sup> wild-type, *Nphp4*<sup>+/+</sup> and *Nphp4*<sup>-/-</sup>  
633 mutant backgrounds. When induced at seven days following birth (P7), *Bbs5*<sup>Δ/Δ</sup> (N=7) animals

634 survived at rates comparable to wild-type (N=7) and *Nphp4*<sup>-/-</sup> (N=4) single mutant animals.  
635 Comparatively, a significant number of *Bbs5*<sup>Δ/Δ</sup>;*Nphp4*<sup>-/-</sup> animals (80%, N=5) die following  
636 induction. A similar effect is seen in *Bbs5*<sup>Δ/Δ</sup>;*Nphp4*<sup>+/+</sup> animals (50%, N=6), further supporting  
637 the existence of a genetic interaction between *Bbs5* and *Nphp4* mutant alleles.

638

639 **Supplemental video 1. Seizure-like or ataxia activity in P7 induced *Bbs5*<sup>Δ/Δ</sup>; *Nphp4*<sup>-/-</sup>**  
640 **animals.** *Bbs5*<sup>Δ/Δ</sup>; *Nphp4*<sup>-/-</sup> animal displaying uncoordinated behaviors and seizure-like activity.  
641 *Bbs5* deletion was induced at P7.

642

643 **Supplementary Table 1. *C. elegans* strains used in studies.**

644

645 **Supplemental figure 1. Dye filling analysis of *bbs-5(gk537)* and *bbs-5(gk507)* deletion alleles.**

646 A) Allele maps of *bbs-5(gk537)*, and *bbs-5(gk507)* with asterisks indicating transcription factor  
647 (\*) binding sites and 'M' indicating an in-frame methionine residue. B) DiI dye filling of amphid  
648 (top panels) and phasmid (bottom panels) neurons in *C. elegans*. Percentages indicate frequency  
649 of most common dye filling phenotype. C) Quantification of Normal, Partial Dyf, and Dyf  
650 phenotypes in amphid (left) and phasmid (right) neurons. N values represent total number of  
651 animals analyzed from at least two experiments. Dyf, dye filling defective. D) RT-PCR analysis  
652 of transcripts generated from *bbs-5(gk507)*, *bbs-5(gk537)* and *bbs-5(yhw62)* cDNA.

653

654 **Supplemental figure 2. Analysis of sensory neuron mediated behaviors between *nphp-4* and**  
655 ***bbs-5* using *bbs-5* deletion alleles.** A) Chemotaxis to attractive compounds recognized by the  
656 AWA neurons (diacetyl and pyrazine) or AWC neurons (benzaldehyde or 2,3-pentanedione) was

657 measured, generating a Chemotaxis index (CI).  $n \geq 50$  animals per strain, for at least three  
658 replicate experiments. \* indicates  $p < 0.05$  when compared to N2 control. B) Assessment of ability  
659 to form dauer-stage animals.  $N = 3$  replicate experiments. C) Number of eggs laid during 24-  
660 hour intervals following L4 stage.  $n \geq 6$  animals per strain. D) Total number of eggs laid during  
661 the course of adulthood.  $n \geq 6$  animals per strain. E) Visualization of eggs laid in first 24 hours  
662 following L4 stage. Each individual egg is pseudo-colored in blue. Scale bar is 1 mm. (Average  
663 eggs per strain over time *bbs-5(gk507)*: 28 eggs from 48-72 hours, 138 eggs from 72-96 hours,  
664 92 eggs from 96-120 hours, and 24 eggs from 120-144 hours. *bbs-5(gk537)*: 51 eggs from 48-72  
665 hours, 107 eggs from 72-96 hours, 51 eggs from 96-120 hours, and 17 eggs from 120-144 hours.  
666 *nphp-4(tm925);bbs-5(gk507)* 60 eggs from 48-72 hours, 125 eggs from 72-96 hours, 58 eggs  
667 from 96-120 hours, and 10 eggs from 120-144 hours. *nphp-4(tm925);bbs-5(gk537)* 23 eggs from  
668 48-72 hours, 96 eggs from 72-96 hours, 102 eggs from 96-120 hours, and 28 eggs from 120-144  
669 hours). F) Measurement of eggs retained in the uterus of adults 24 hours following L4 stage.  $n =$   
670 20 animals per strain. ns = not significant. Error bars represent standard deviation.

671

672 **Supplemental figure 3. Localization of ciliary ODR-10 and nonciliary RPI-2 membrane**

673 **proteins in *bbs-5(gk537)* and *bbs-5(gk537);nphp-4(tm925)* double mutants.** A) RPI-2::GFP

674 protein is excluded from the cilium in N2 worms; it enters the cilium in *bbs-5(gk537)*, and *bbs-*

675 *5(gk537);nphp-4(tm925)* double mutants. Data is shown for the phasmid sensilla. B) ODR-

676 10::GFP protein is located normally in the neurons of the amphid sensilla in *bbs-5(gk537)*, and

677 *bbs-5(gk537);nphp-4(tm925)* double mutants. Representative images selected from among at

678 least 5 animals.

679

680 **Supplemental figure 4. FRAP of ODR-10::GFP reporter.** Fluorescence Recovery after  
681 Photobleaching (FRAP) of ODR-10::GFP protein in cilia of control and all mutant backgrounds  
682 in the neurons of the amphid sensilla over time.  
683

684  
685  
686  
687  
688  
689  
690  
691  
692  
693  
694  
695  
696  
697  
698  
699  
700  
701  
702  
703  
704  
705  
706  
707  
708  
709  
710  
711  
712  
713  
714  
715  
716  
717  
718  
719  
720  
721  
722  
723  
724  
725  
726  
727  
728  
729

## References

- Albert, P. S., S. J. Brown and D. L. Riddle, 1981 Sensory control of dauer larva formation in *Caenorhabditis elegans*. *J Comp Neurol* 198: 435-451.
- Bales, K. L., M. R. Bentley, M. J. Croyle, R. A. Kesterson, B. K. Yoder *et al.*, 2020 BBSome Component BBS5 Is Required for Cone Photoreceptor Protein Trafficking and Outer Segment Maintenance. *Invest Ophthalmol Vis Sci* 61: 17.
- Bargmann, C. I., 1993 Genetic and cellular analysis of behavior in *C. elegans*. *Annu Rev Neurosci* 16: 47-71.
- Bentley-Ford, M. R., S. E. Engle, K. R. Clearman, C. J. Haycraft, R. S. Andersen *et al.*, 2021 A mouse model of BBS identifies developmental and homeostatic effects of BBS5 mutation and identifies novel pituitary abnormalities. *Hum Mol Genet*.
- Blacque, O. E., E. A. Perens, K. A. Boroevich, P. N. Inglis, C. Li *et al.*, 2005 Functional genomics of the cilium, a sensory organelle. *Curr Biol* 15: 935-941.
- Brenner, S., 1974 The genetics of *Caenorhabditis elegans*. *Genetics* 77: 71-94.
- Carvalho-Santos, Z., J. Azimzadeh, J. B. Pereira-Leal and M. Bettencourt-Dias, 2011 Evolution: Tracing the origins of centrioles, cilia, and flagella. *J Cell Biol* 194: 165-175.
- Chih, B., P. Liu, Y. Chinn, C. Chalouni, L. G. Komuves *et al.*, 2011 A ciliopathy complex at the transition zone protects the cilia as a privileged membrane domain. *Nat Cell Biol* 14: 61-72.
- Chizhikov, V. V., J. Davenport, Q. Zhang, E. K. Shih, O. A. Cabello *et al.*, 2007 Cilia proteins control cerebellar morphogenesis by promoting expansion of the granule progenitor pool. *J Neurosci* 27: 9780-9789.
- Drummond, I., 2009 Studying cilia in zebrafish. *Methods Cell Biol* 93: 197-217.
- Franco, B., and C. Thauvin-Robinet, 2016 Update on oral-facial-digital syndromes (OFDS). *Cilia* 5: 12.
- Garcia-Gonzalo, F. R., K. C. Corbit, M. S. Simerol-Piquer, G. Ramaswami, E. A. Otto *et al.*, 2011 A transition zone complex regulates mammalian ciliogenesis and ciliary membrane composition. *Nat Genet* 43: 776-784.
- Goetz, S. C., F. Bangs, C. L. Barrington, N. Katsanis and K. V. Anderson, 2017 The Meckel syndrome-associated protein MKS1 functionally interacts with components of the BBSome and IFT complexes to mediate ciliary trafficking and hedgehog signaling. *PLoS One* 12: e0173399.
- Golden, J. W., and D. L. Riddle, 1982 A pheromone influences larval development in the nematode *Caenorhabditis elegans*. *Science* 218: 578-580.
- Hartill, V., K. Szymanska, S. M. Sharif, G. Wheway and C. A. Johnson, 2017 Meckel-Gruber Syndrome: An Update on Diagnosis, Clinical Management, and Research Advances. *Front Pediatr* 5: 244.
- Inglis, P. N., G. Ou, M. R. Leroux and J. M. Scholey, 2007 The sensory cilia of *Caenorhabditis elegans*. *WormBook*: 1-22.
- Juang, B. T., C. Gu, L. Starnes, F. Palladino, A. Goga *et al.*, 2013 Endogenous nuclear RNAi mediates behavioral adaptation to odor. *Cell* 154: 1010-1022.
- LaBonty, M., N. Pray and P. C. Yelick, 2017 A Zebrafish Model of Human Fibrodysplasia Ossificans Progressiva. *Zebrafish* 14: 293-304.



- 730 Lee, K., and D. S. Portman, 2007 Neural sex modifies the function of a *C. elegans* sensory  
731 circuit. *Curr Biol* 17: 1858-1863.
- 732 Loktev, A. V., Q. Zhang, J. S. Beck, C. C. Searby, T. E. Scheetz *et al.*, 2008 A BBSome subunit  
733 links ciliogenesis, microtubule stability, and acetylation. *Dev Cell* 15: 854-865.
- 734 Luo, F., and Y. H. Tao, 2018 Nephronophthisis: A review of genotype-phenotype correlation.  
735 *Nephrology (Carlton)* 23: 904-911.
- 736 Masyukova, S. V., D. E. Landis, S. J. Henke, C. L. Williams, J. N. Pieczynski *et al.*, 2016 A  
737 Screen for Modifiers of Cilia Phenotypes Reveals Novel MKS Alleles and Uncovers a  
738 Specific Genetic Interaction between *osm-3* and *nphp-4*. *PLoS Genet* 12: e1005841.
- 739 Nachury, M. V., A. V. Loktev, Q. Zhang, C. J. Westlake, J. Peranen *et al.*, 2007 A core complex  
740 of BBS proteins cooperates with the GTPase Rab8 to promote ciliary membrane  
741 biogenesis. *Cell* 129: 1201-1213.
- 742 Nakayama, K., and Y. Katoh, 2018 Ciliary protein trafficking mediated by IFT and BBSome  
743 complexes with the aid of kinesin-2 and dynein-2 motors. *J Biochem* 163: 155-164.
- 744 Perkins, L. A., E. M. Hedgecock, J. N. Thomson and J. G. Culotti, 1986 Mutant sensory cilia in  
745 the nematode *Caenorhabditis elegans*. *Dev Biol* 117: 456-487.
- 746 Porter, K. R., 1955 The submicroscopic morphology of protoplasm. *Harvey Lect* 51: 175-228.
- 747 Reiter, J. F., and M. R. Leroux, 2017 Genes and molecular pathways underpinning ciliopathies.  
748 *Nat Rev Mol Cell Biol* 18: 533-547.
- 749 Ronquillo, C. C., P. S. Bernstein and W. Baehr, 2012 Senior-Loken syndrome: a syndromic form  
750 of retinal dystrophy associated with nephronophthisis. *Vision Res* 75: 88-97.
- 751 Sang, L., J. J. Miller, K. C. Corbit, R. H. Giles, M. J. Brauer *et al.*, 2011 Mapping the NPHP-  
752 JBTS-MKS protein network reveals ciliopathy disease genes and pathways. *Cell* 145:  
753 513-528.
- 754 Satir, P., and S. T. Christensen, 2007 Overview of structure and function of mammalian cilia.  
755 *Annu Rev Physiol* 69: 377-400.
- 756 Schafer, J. C., M. E. Winkelbauer, C. L. Williams, C. J. Haycraft, R. A. Desmond *et al.*, 2006  
757 IFTA-2 is a conserved cilia protein involved in pathways regulating longevity and dauer  
758 formation in *Caenorhabditis elegans*. *J Cell Sci* 119: 4088-4100.
- 759 Sengupta, P., and C. I. Bargmann, 1996 Cell fate specification and differentiation in the nervous  
760 system of *Caenorhabditis elegans*. *Dev Genet* 18: 73-80.
- 761 Starich, T. A., R. K. Herman, C. K. Kari, W. H. Yeh, W. S. Schackwitz *et al.*, 1995 Mutations  
762 affecting the chemosensory neurons of *Caenorhabditis elegans*. *Genetics* 139: 171-188.
- 763 Sung, C. H., and M. R. Leroux, 2013 The roles of evolutionarily conserved functional modules  
764 in cilia-related trafficking. *Nat Cell Biol* 15: 1387-1397.
- 765 Suspitsin, E. N., and E. N. Imyanitov, 2016 Bardet-Biedl Syndrome. *Mol Syndromol* 7: 62-71.
- 766 Tsang, S. H., A. R. P. Aycinena and T. Sharma, 2018 Ciliopathy: Alstrom Syndrome. *Adv Exp*  
767 *Med Biol* 1085: 179-180.
- 768 Valente, E. M., B. Dallapiccola and E. Bertini, 2013 Joubert syndrome and related disorders.  
769 *Handb Clin Neurol* 113: 1879-1888.
- 770 Ward, S., 1973 Chemotaxis by the nematode *Caenorhabditis elegans*: identification of attractants  
771 and analysis of the response by use of mutants. *Proc Natl Acad Sci U S A* 70: 817-821.
- 772 Ward, S., N. Thomson, J. G. White and S. Brenner, 1975 Electron microscopical reconstruction  
773 of the anterior sensory anatomy of the nematode *Caenorhabditis elegans*. *J Comp*  
774 *Neurol* 160: 313-337.

- 775 Westerfield, M., 2000 *The Zebrafish Book. A Guide for the Laboratory Use of Zebrafish (Danio*  
776 *rerio)*. University of Oregon, Eugene, OR.
- 777 Williams, C. L., C. Li, K. Kida, P. N. Inglis, S. Mohan *et al.*, 2011 MKS and NPHP modules  
778 cooperate to establish basal body/transition zone membrane associations and ciliary gate  
779 function during ciliogenesis. *J Cell Biol* 192: 1023-1041.
- 780 Winkelbauer, M. E., J. C. Schafer, C. J. Haycraft, P. Swoboda and B. K. Yoder, 2005 The *C.*  
781 *elegans* homologs of nephrocystin-1 and nephrocystin-4 are cilia transition zone proteins  
782 involved in chemosensory perception. *J Cell Sci* 118: 5575-5587.
- 783 Won, J., C. Marin de Evsikova, R. S. Smith, W. L. Hicks, M. M. Edwards *et al.*, 2011 NPHP4 is  
784 necessary for normal photoreceptor ribbon synapse maintenance and outer segment  
785 formation, and for sperm development. *Hum Mol Genet* 20: 482-496.
- 786 Ye, F., A. R. Nager and M. V. Nachury, 2018 BBSome trains remove activated GPCRs from  
787 cilia by enabling passage through the transition zone. *J Cell Biol* 217: 1847-1868.
- 788 Yee, L. E., F. R. Garcia-Gonzalo, R. V. Bowie, C. Li, J. K. Kennedy *et al.*, 2015 Conserved  
789 Genetic Interactions between Ciliopathy Complexes Cooperatively Support Ciliogenesis  
790 and Ciliary Signaling. *PLoS Genet* 11: e1005627.
- 791 Yoder, B. K., 2007 Role of primary cilia in the pathogenesis of polycystic kidney disease. *J Am*  
792 *Soc Nephrol* 18: 1381-1388.
- 793 Zhao, C., and J. Malicki, 2011 Nephrocystins and MKS proteins interact with IFT particle and  
794 facilitate transport of selected ciliary cargos. *EMBO J* 30: 2532-2544.
- 795
- 796

Figure 1

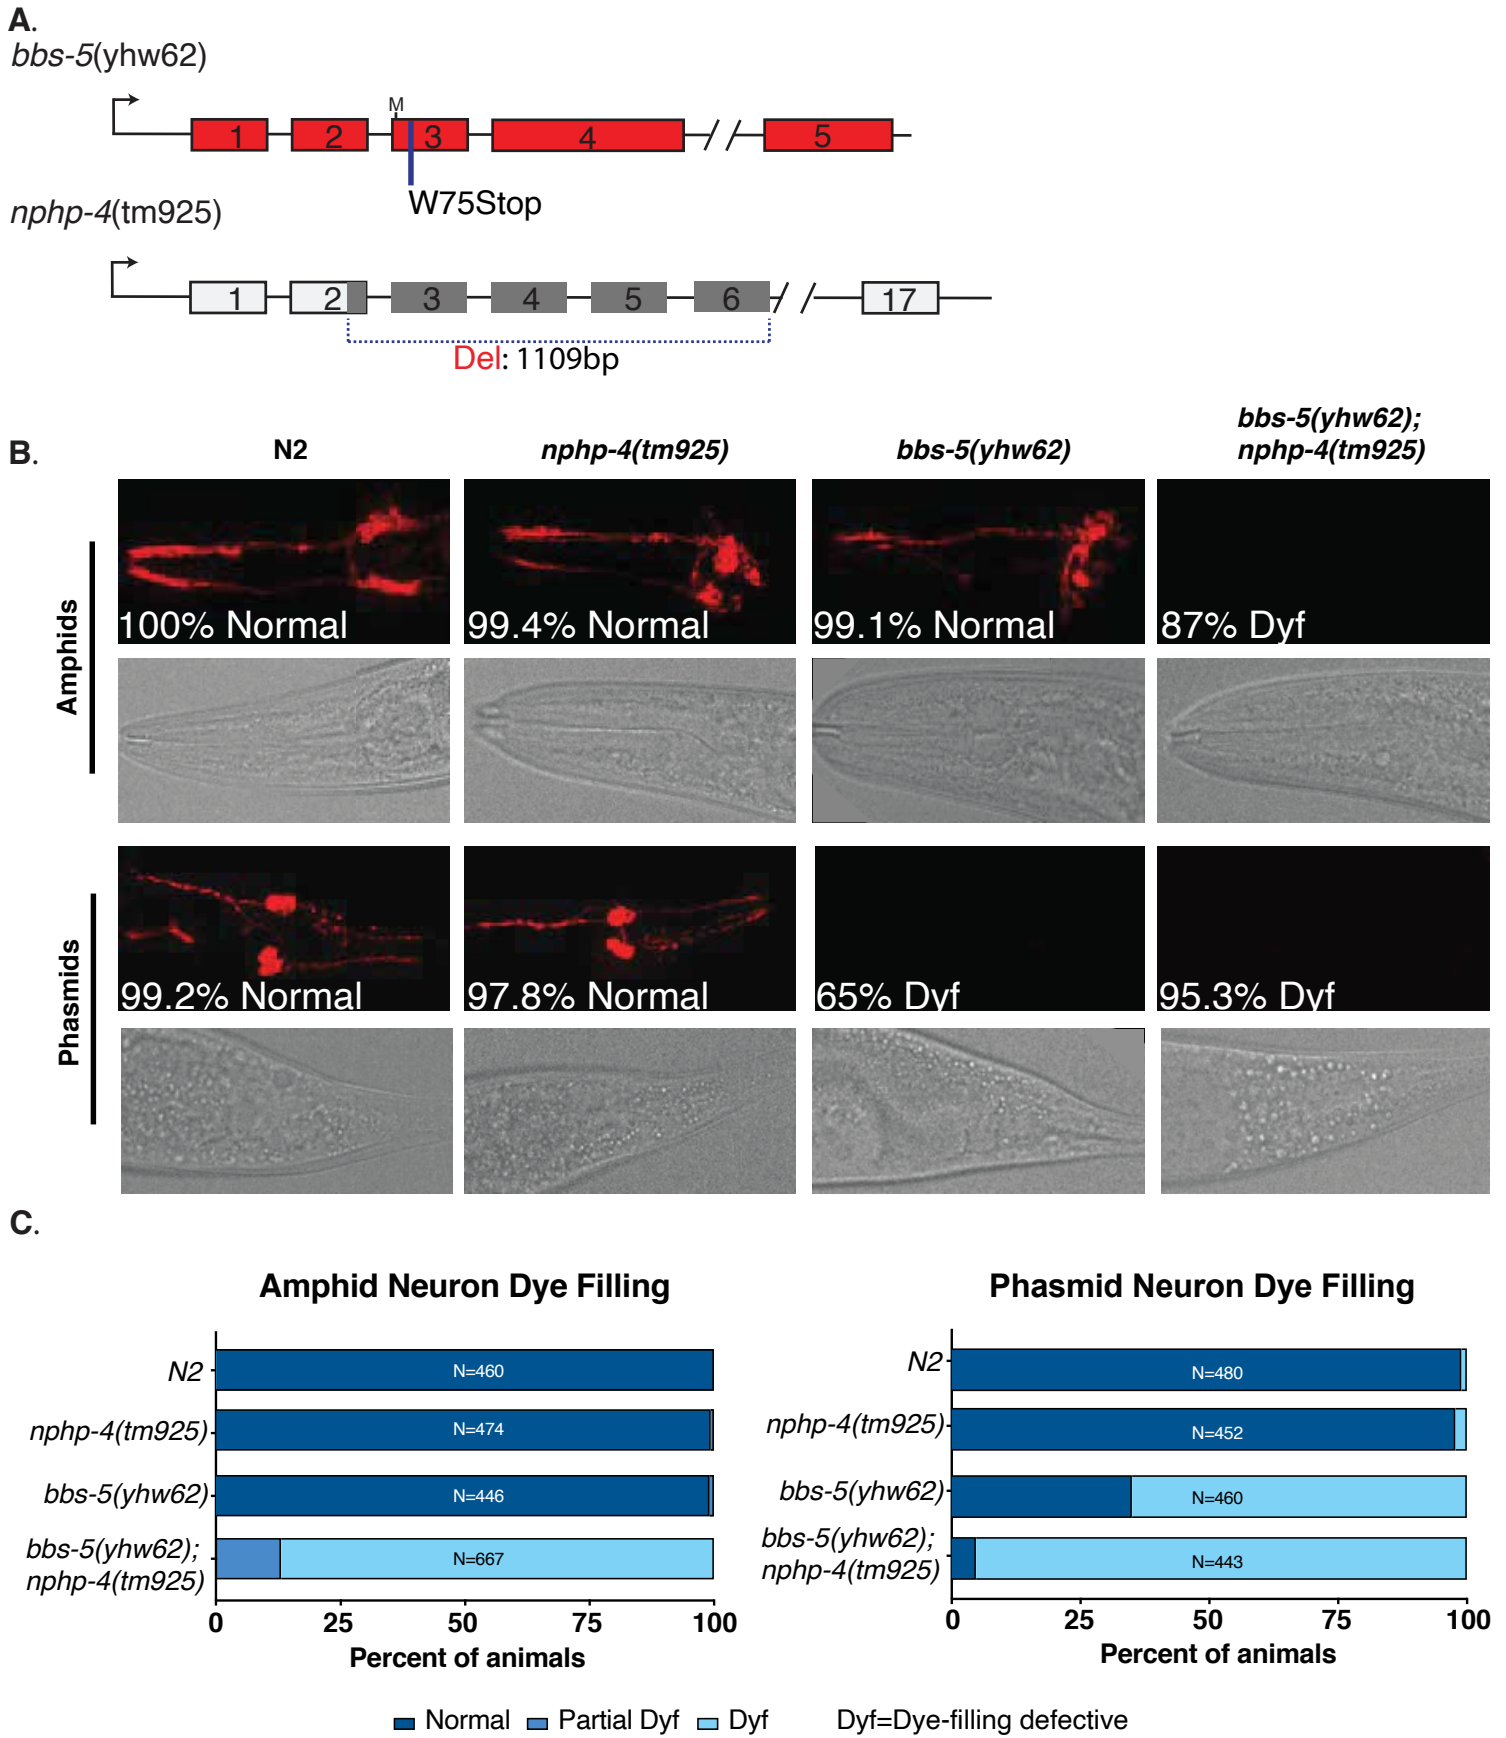

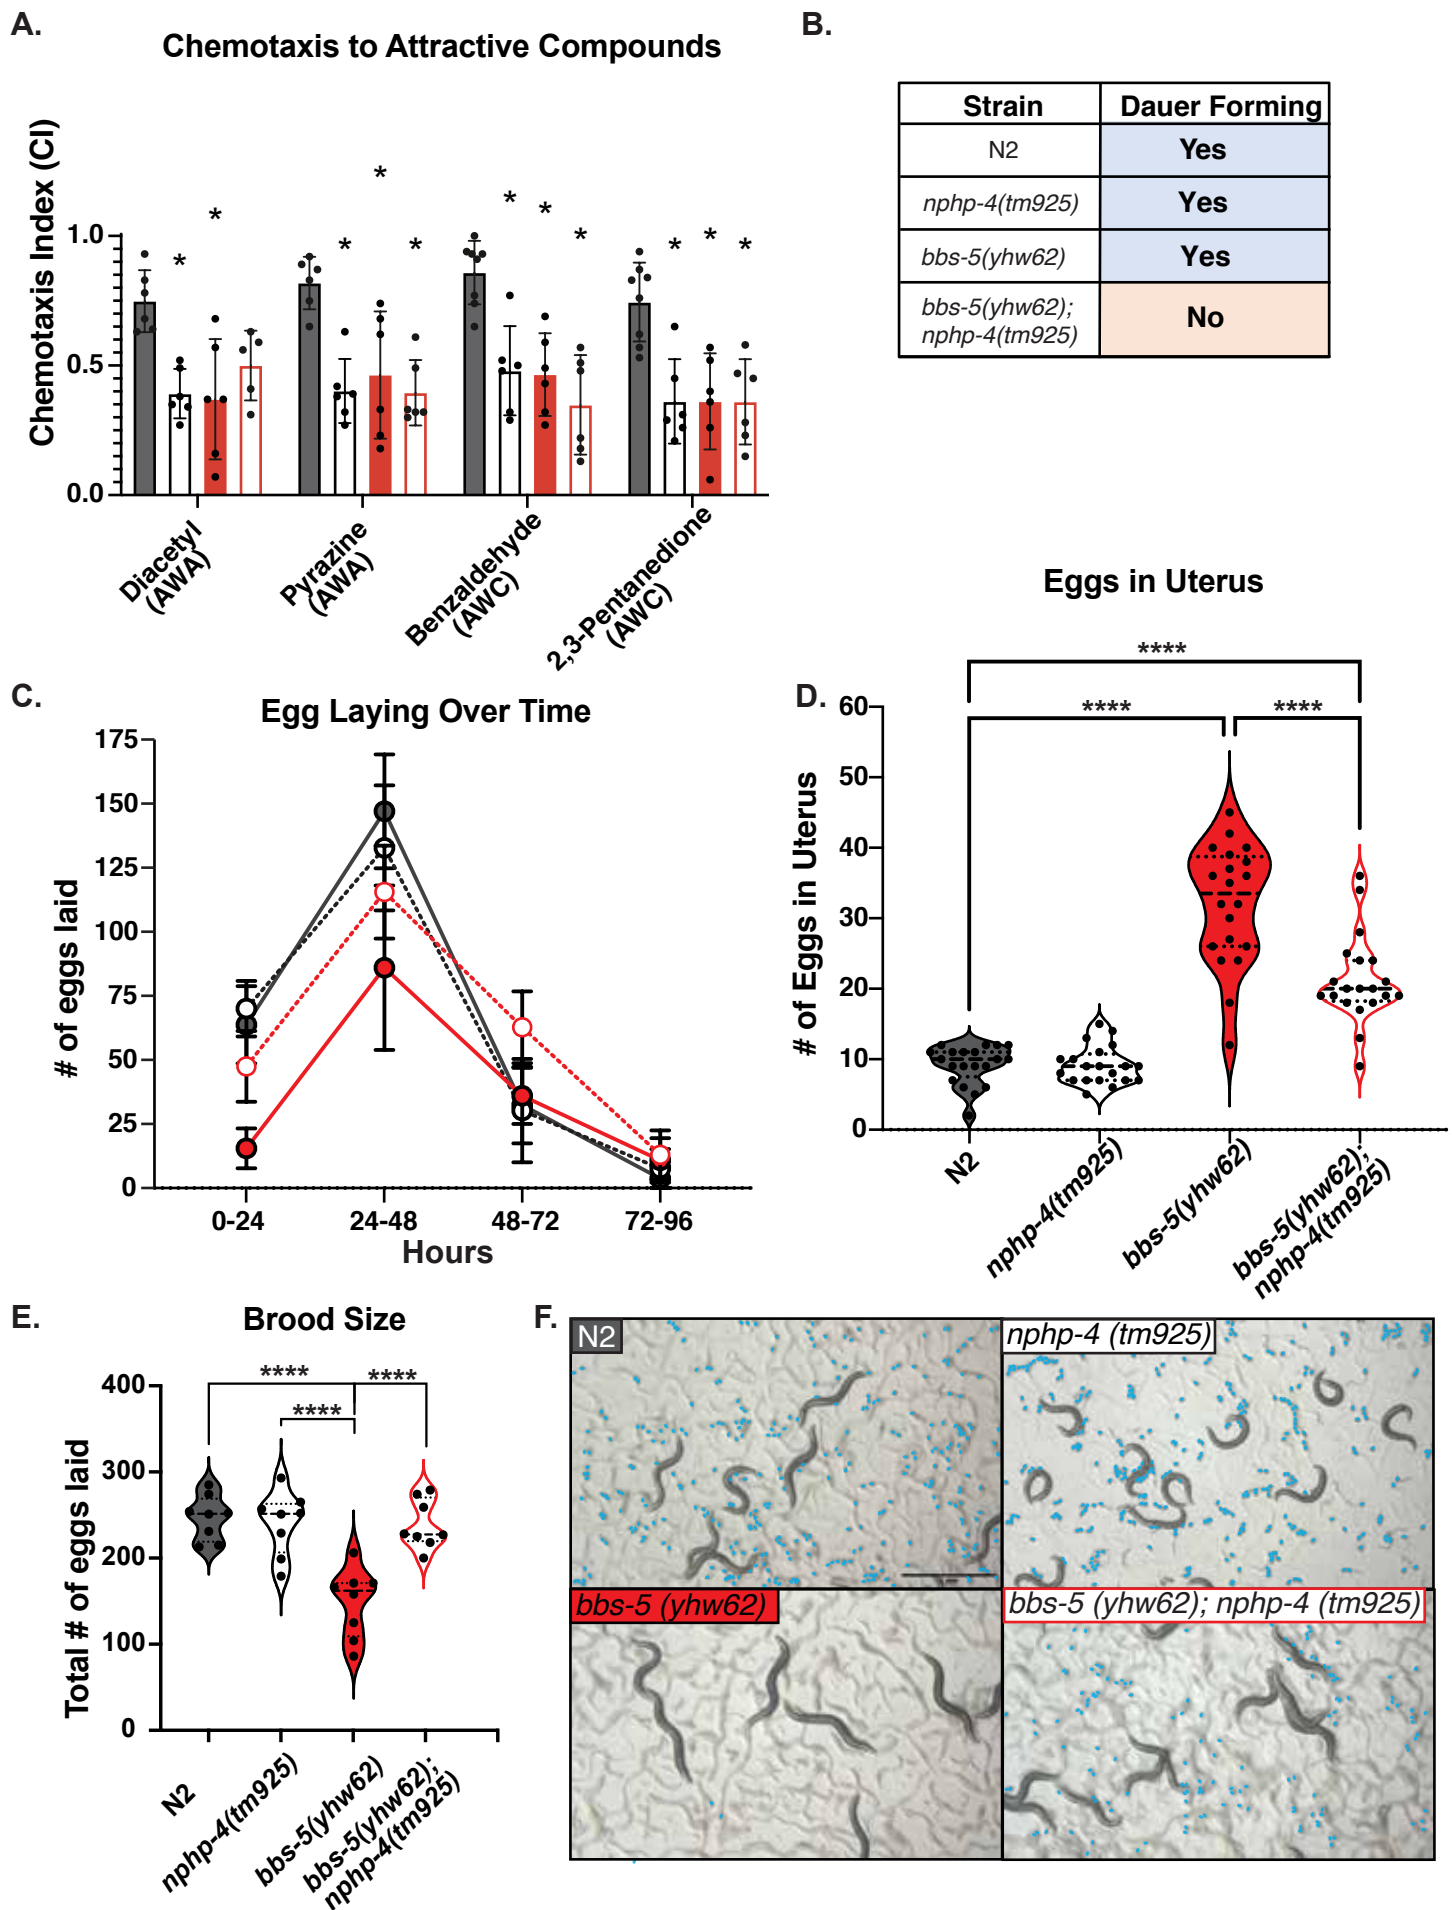

Figure 3

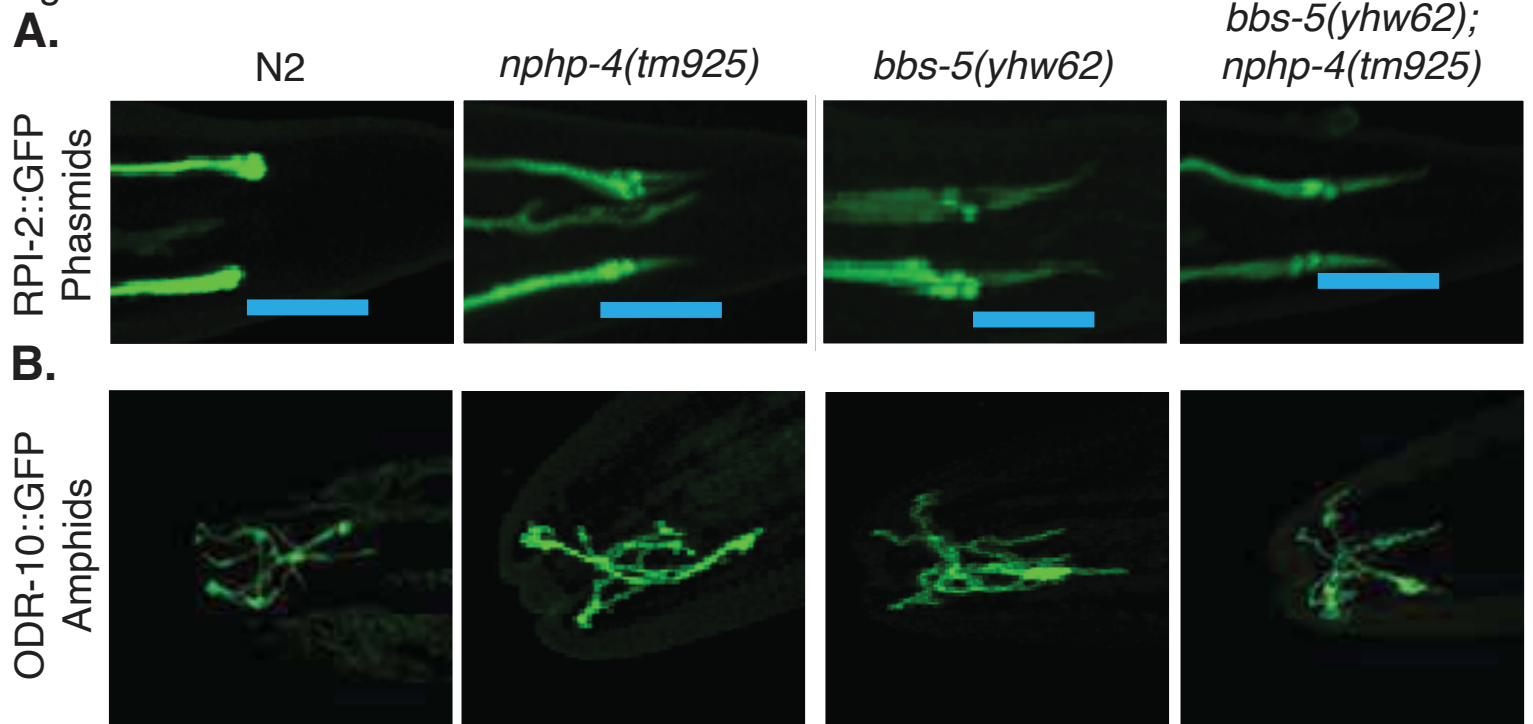



Figure 4

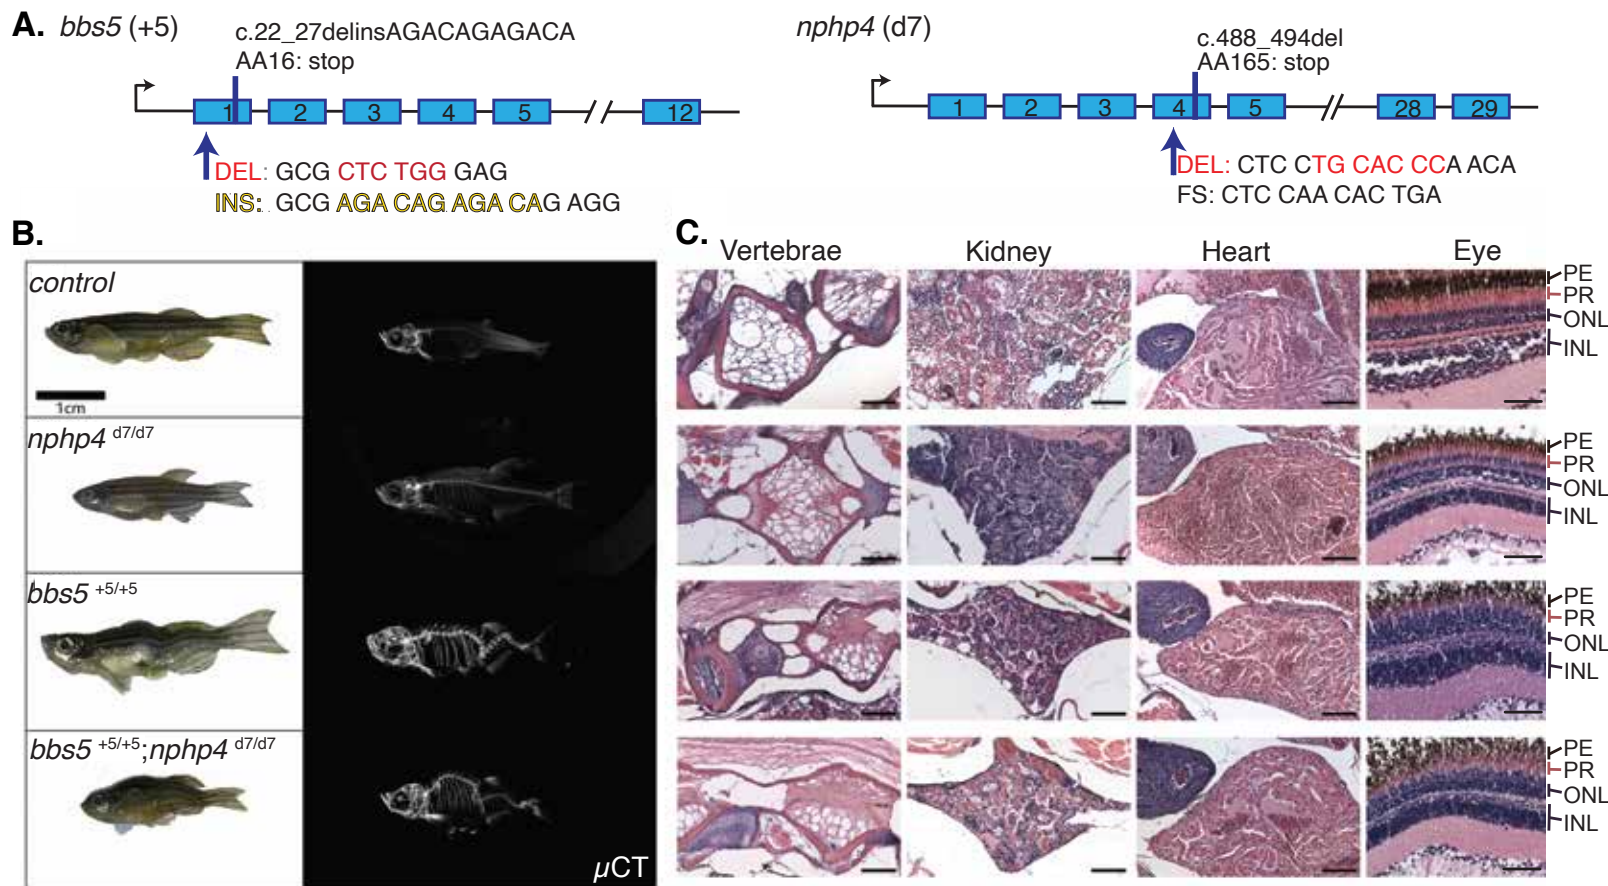

Figure 5

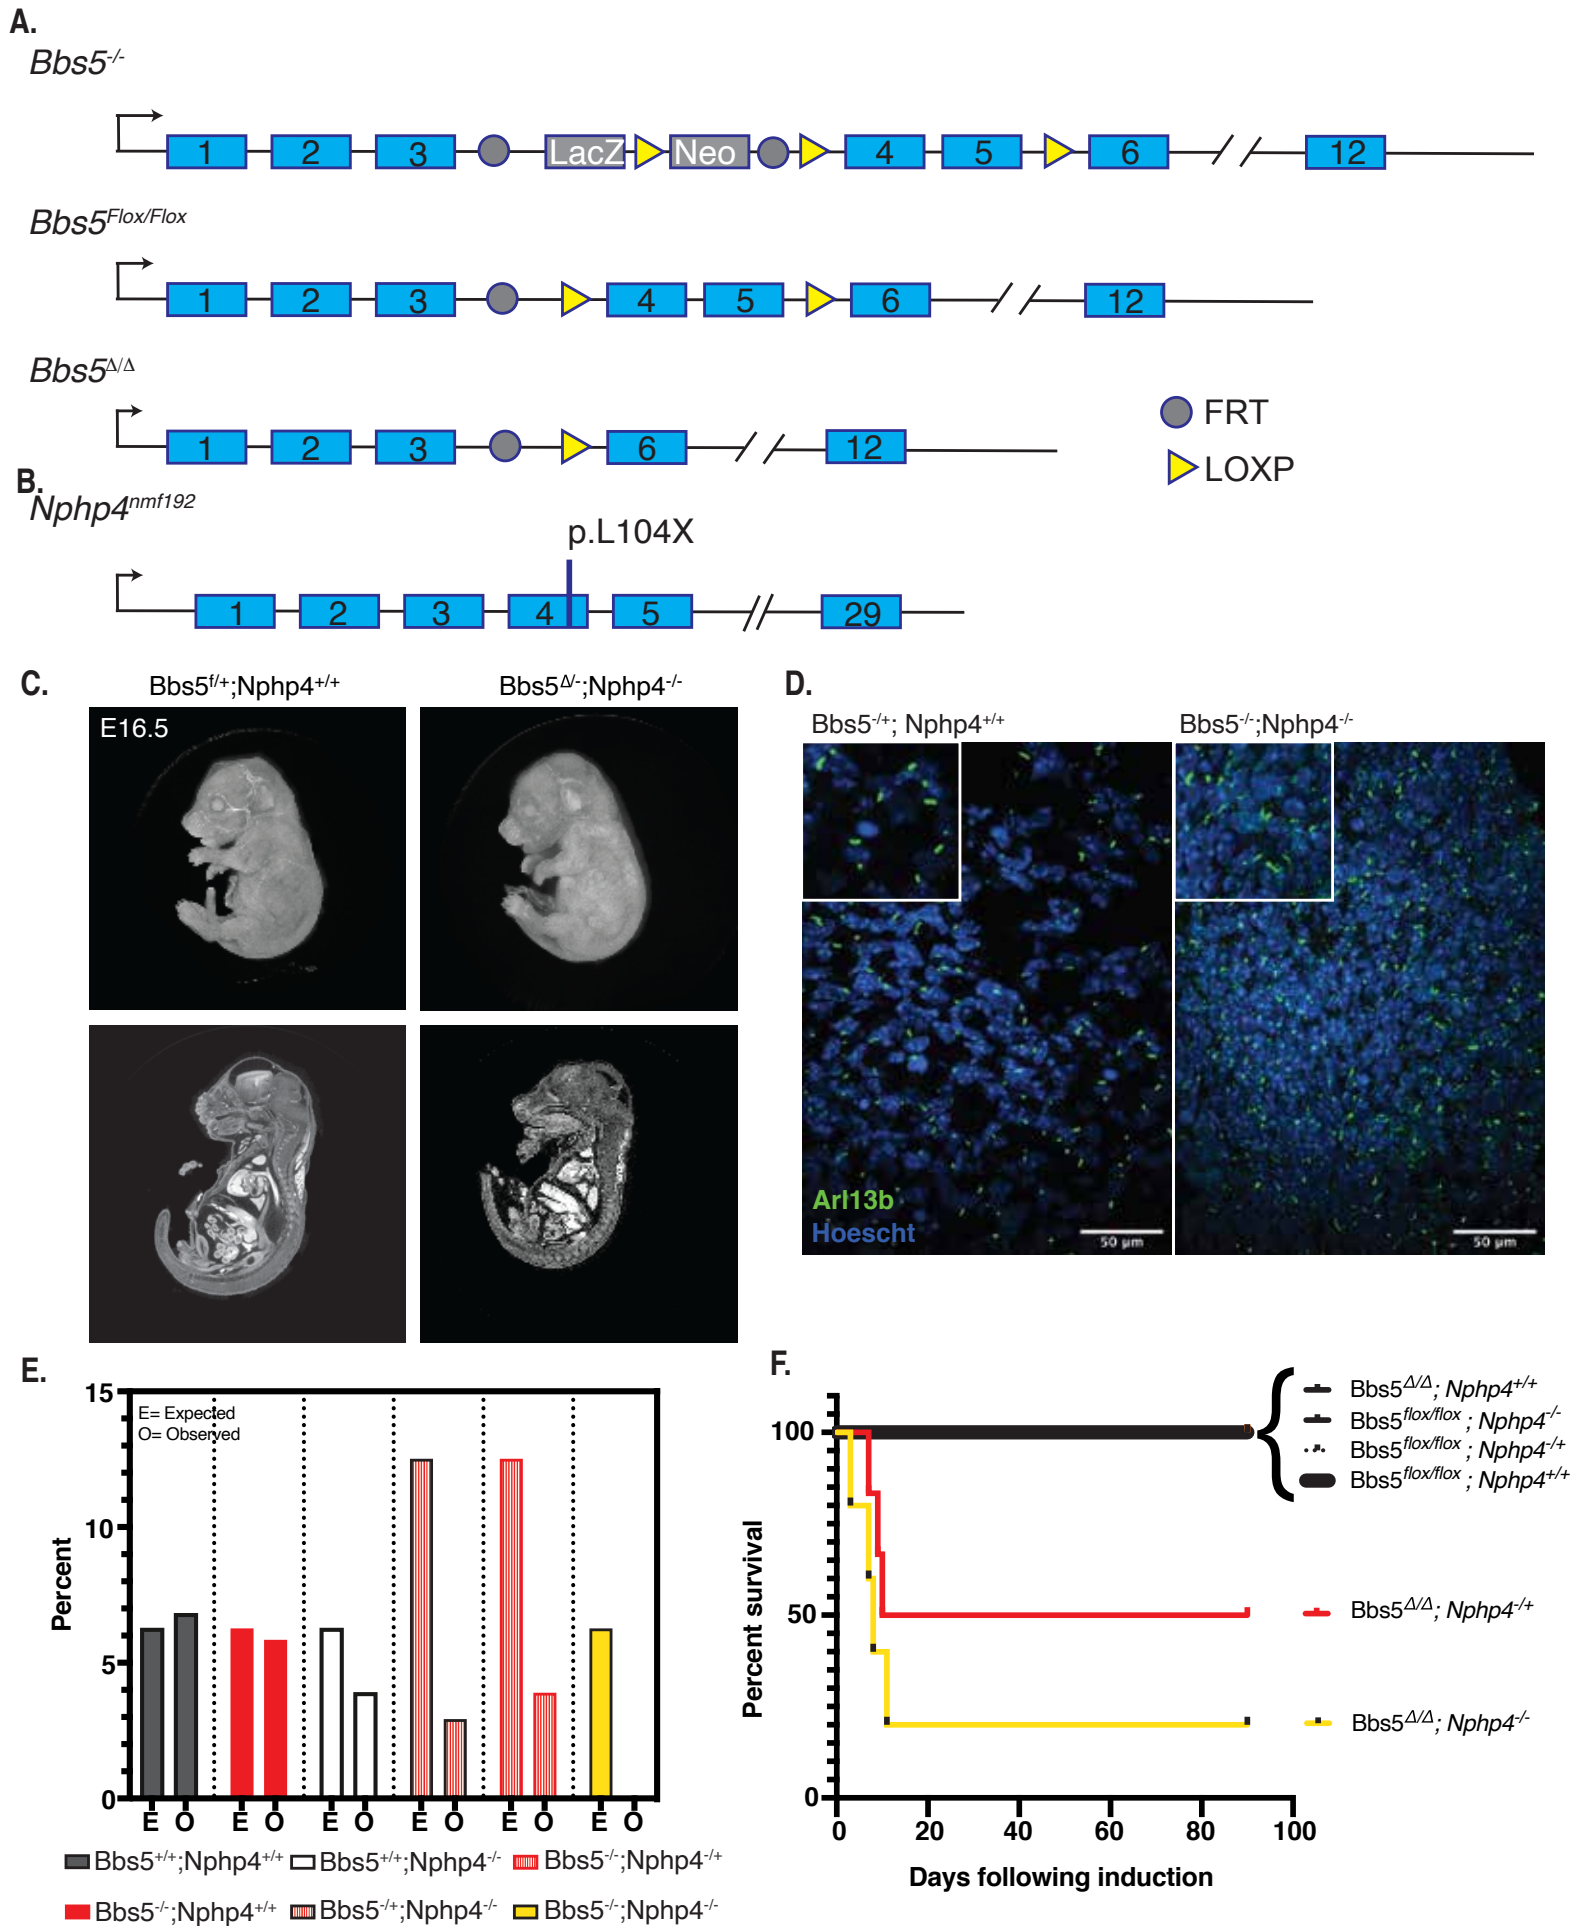

| Strain | Genotype                                                                                                |
|--------|---------------------------------------------------------------------------------------------------------|
| N2     | <i>C. elegans</i> wild isolate                                                                          |
| CX3344 | <i>kyls53 [odr-10::GFP]</i>                                                                             |
| FX925  | <i>nphp-4(tm925)</i>                                                                                    |
| VC1113 | <i>bbs-5(gk507)</i>                                                                                     |
| VC1316 | <i>bbs-5(gk537)</i>                                                                                     |
| YH1126 | <i>bbs-5(yhw62); nphp-4(tm925)</i>                                                                      |
| YH1158 | <i>bbs-5(gk537); nphp-4(tm925)</i>                                                                      |
| YH2082 | <i>bbs-5(yhw62)</i>                                                                                     |
| YH2108 | <i>bbs-5(gk537); nphp-4(tm925); yhEx510[rpi-2::RPI-2::GFP; osm-5p::TRAM-1::tdTomato; rol-6(su1006)]</i> |
| YH2109 | <i>yhEx510[rpi-2::RPI-2::GFP; osm-5p::TRAM-1::tdTomato; rol-6(su1006)]</i>                              |
| YH2111 | <i>nphp-4(tm925); yhEx510[rpi-2::RPI-2::GFP; osm-5p::TRAM-1::tdTomato; rol-6(su1006)]</i>               |
| YH2112 | <i>bbs-5(gk537); yhEx510[rpi-2::RPI-2::GFP; osm-5p::TRAM-1::tdTomato; rol-6(su1006)]</i>                |
| YH2114 | <i>bbs-5(yhw62); nphp-4(tm925); yhEx513[rpi-2::RPI-2::GFP; osm-5p::TRAM-1::tdTomato; rol-6(su1006)]</i> |
| YH2115 | <i>bbs-5(yhw62); yhEx513[rpi-2::RPI-2::GFP; osm-5p::TRAM-1::tdTomato; rol-6(su1006)]</i>                |
| YH2116 | <i>nphp-4(tm925); kyls53 [odr-10::GFP]</i>                                                              |
| YH2117 | <i>bbs-5(yhw62); kyls53 [odr-10::GFP]</i>                                                               |
| YH2119 | <i>bbs-5(yhw62); nphp-4(tm925); kyls53 [odr-10::GFP]</i>                                                |
| YH2120 | <i>bbs-5(gk537); kyls53 [odr-10::GFP]</i>                                                               |
| YH2121 | <i>bbs-5(gk537); nphp-4(tm925); kyls53 [odr-10::GFP]</i>                                                |
| YH2125 | <i>bbs-5(gk507); nphp-4(tm925)</i>                                                                      |



Supplemental figure 1

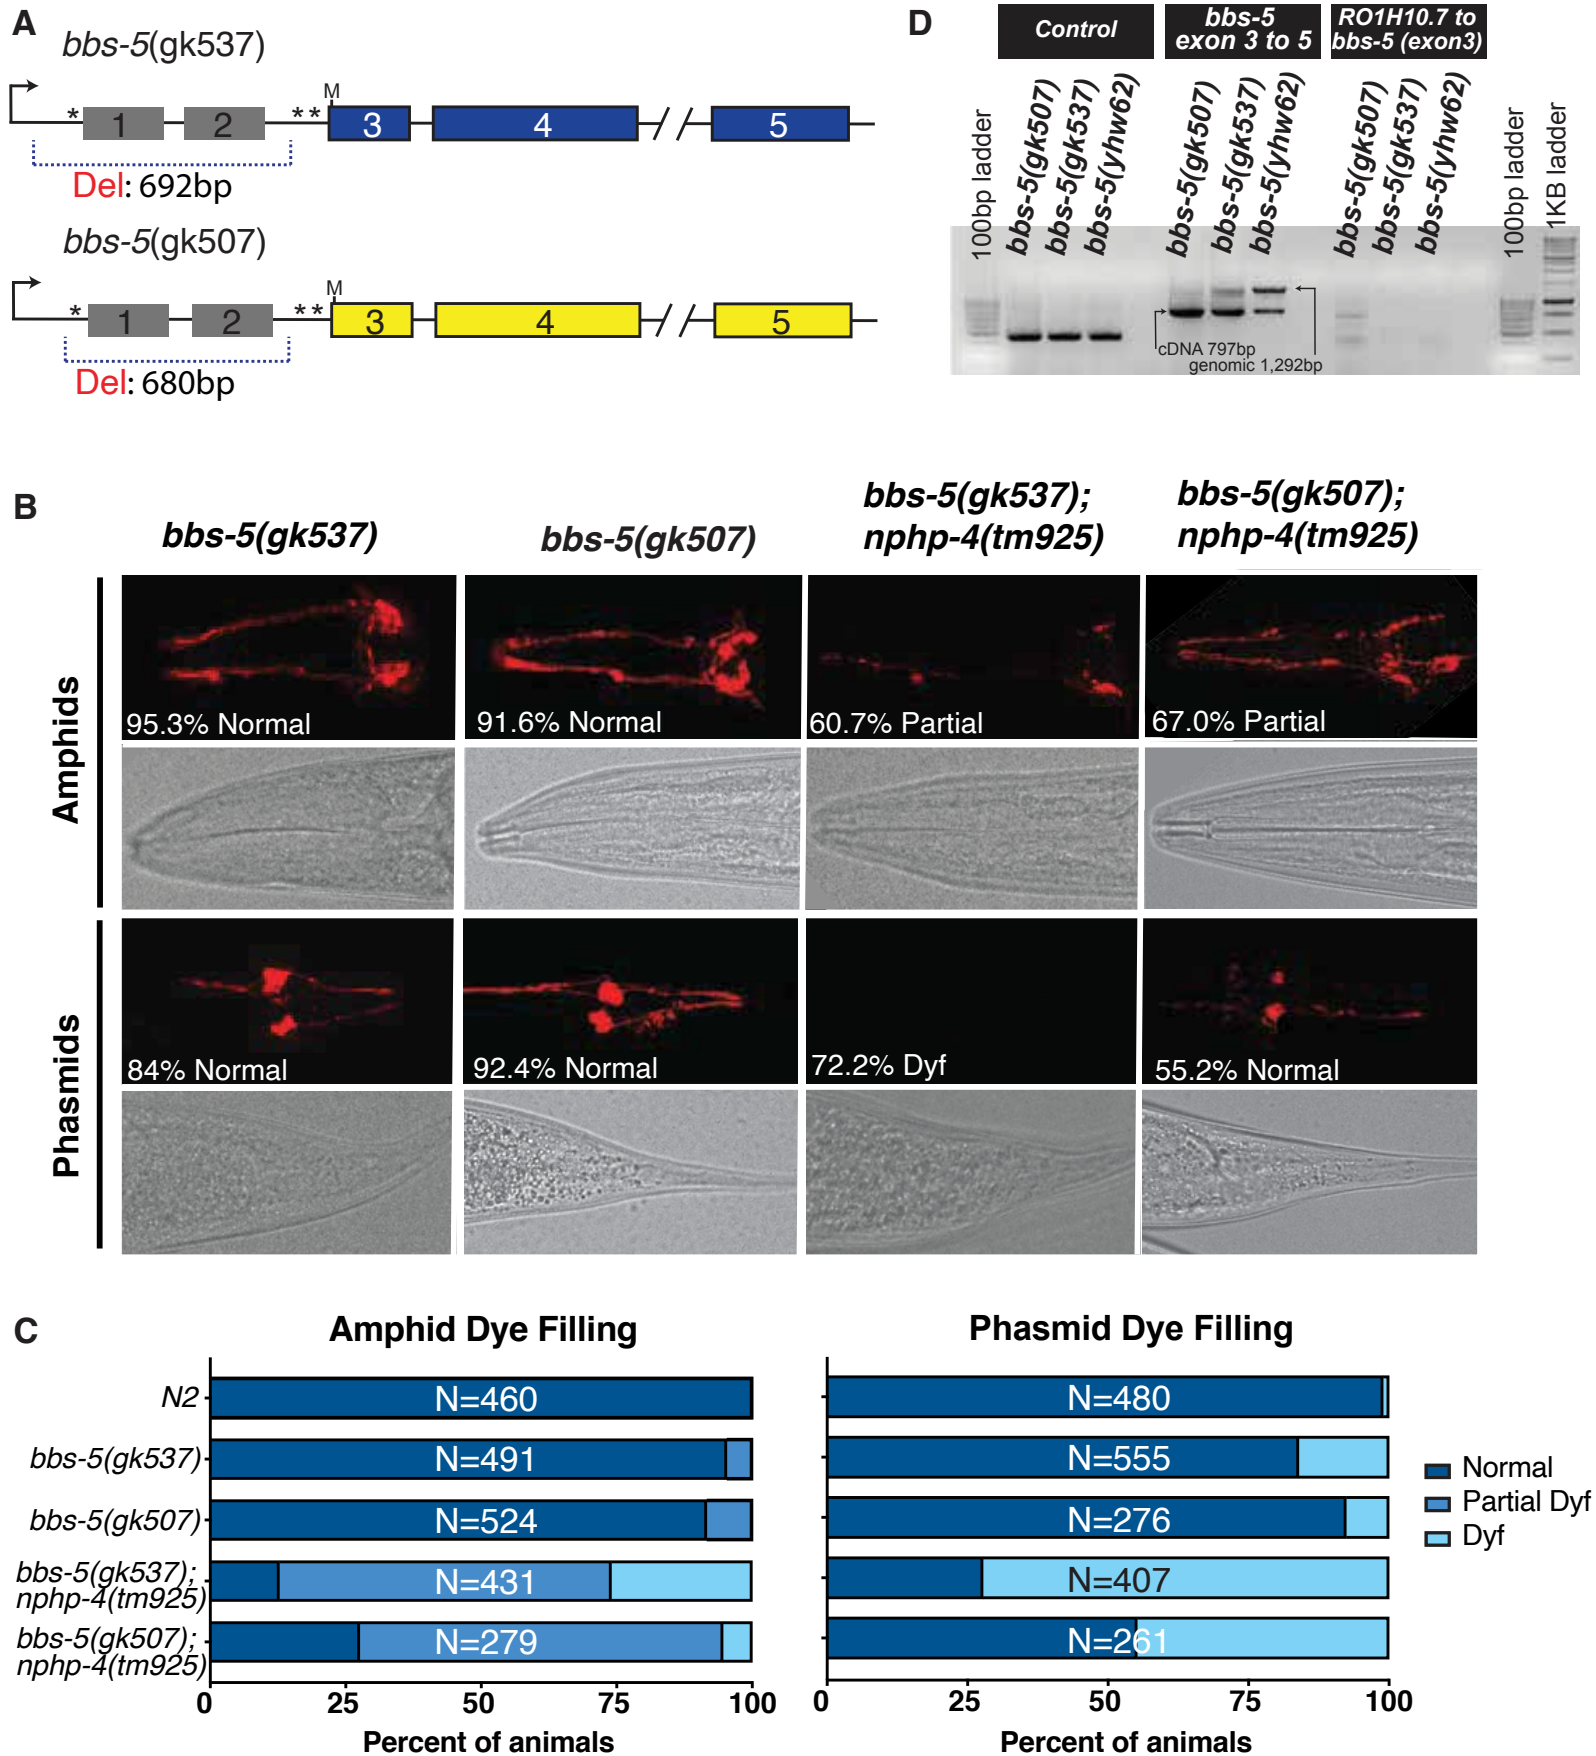

A.

### Chemotaxis to Attractive Compounds

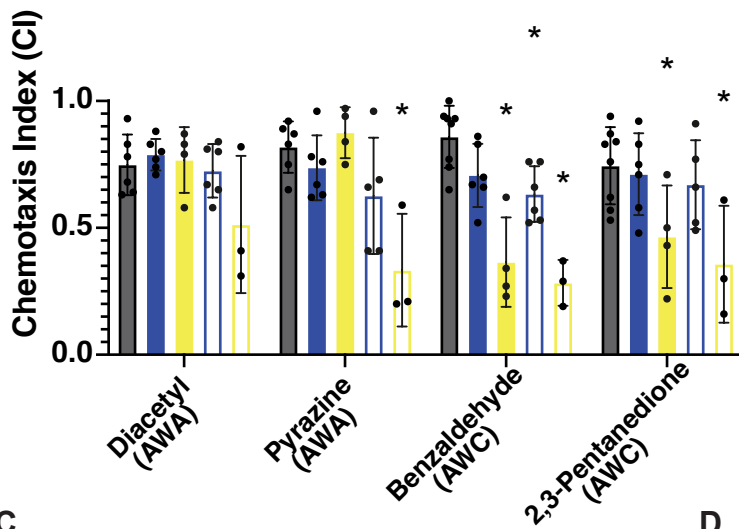

B.

| Strain                             | Dauer Forming |
|------------------------------------|---------------|
| <i>bbs-5(gk537)</i>                | Yes           |
| <i>bbs-5(gk507)</i>                | Yes           |
| <i>bbs-5(gk537); nphp-4(tm925)</i> | No            |
| <i>bbs-5(gk507); nphp-4(tm925)</i> | No            |

C.

### Egg Laying Over Time

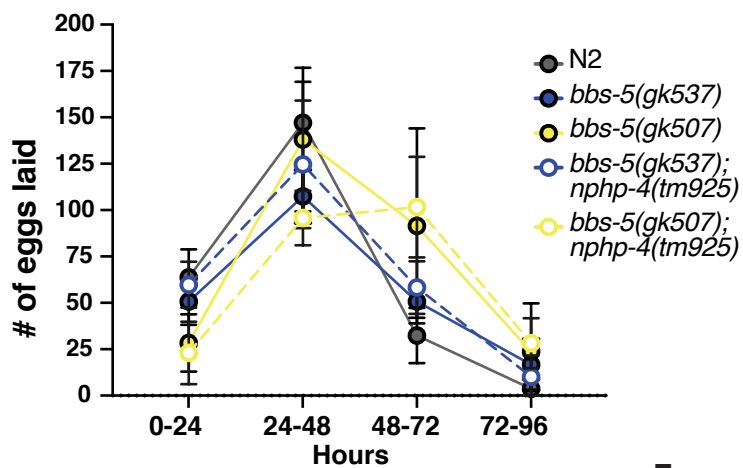

D.

### Eggs in Uterus

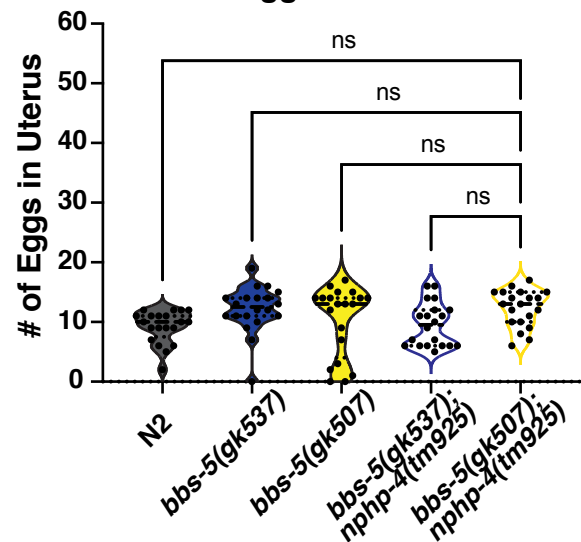

E.

### Brood Size

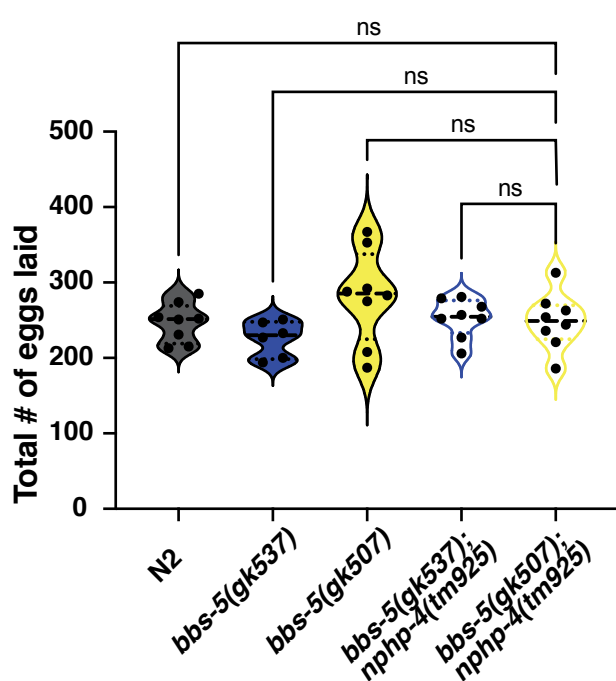

F.

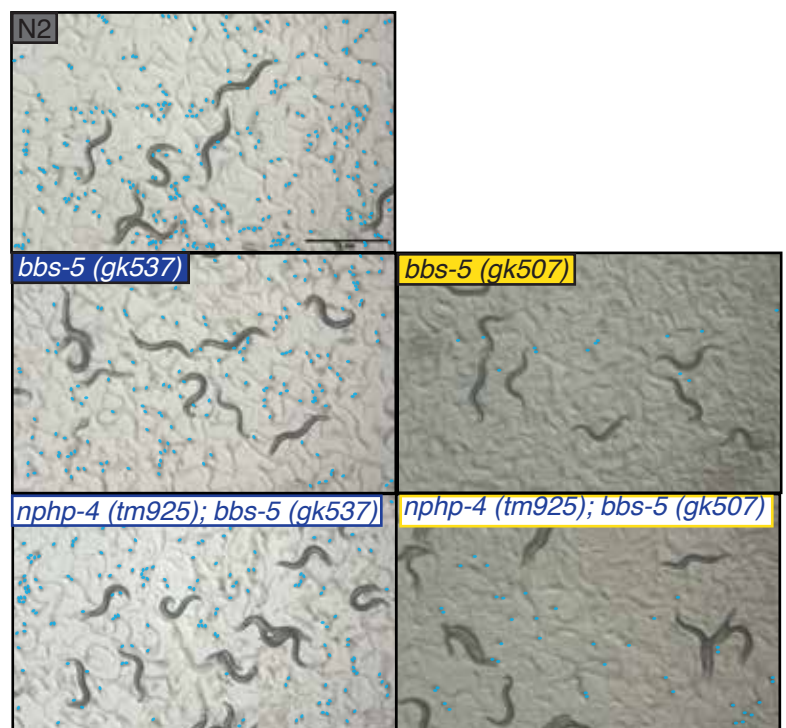

## Supplemental figure 3

**A.**

*bbs-5(gk537)*

*bbs-5(gk537);  
nphp-4(tm925)*

RPI-2::GFP  
Phasmids

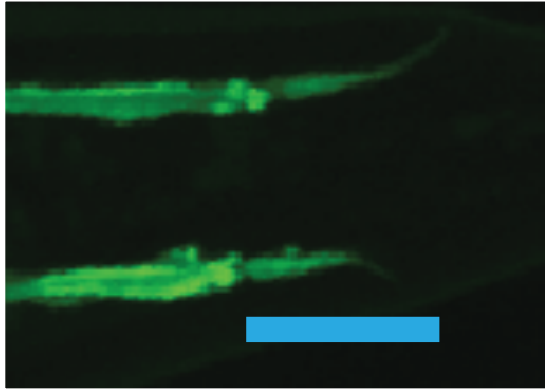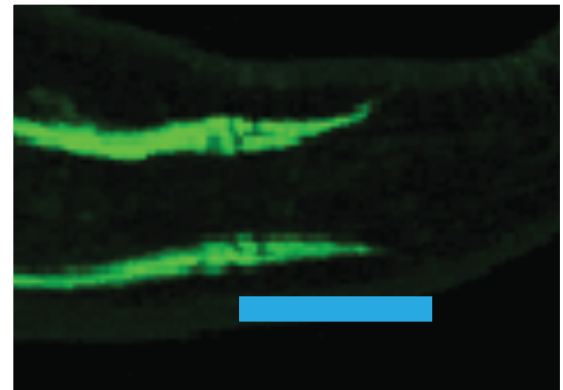

**B.**

ODR-10::GFP  
Amphids

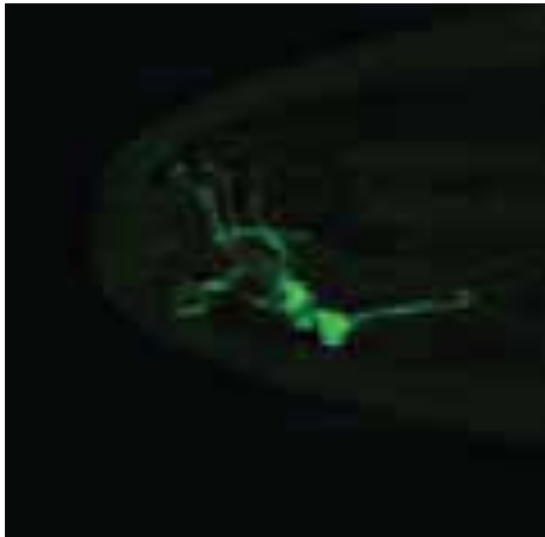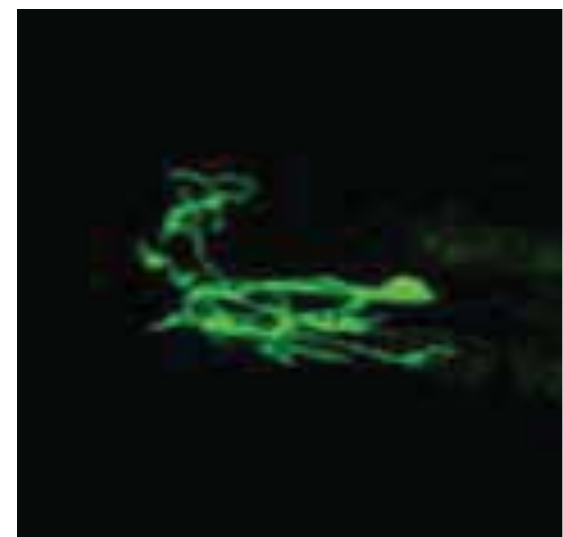

Supplemental figure 4

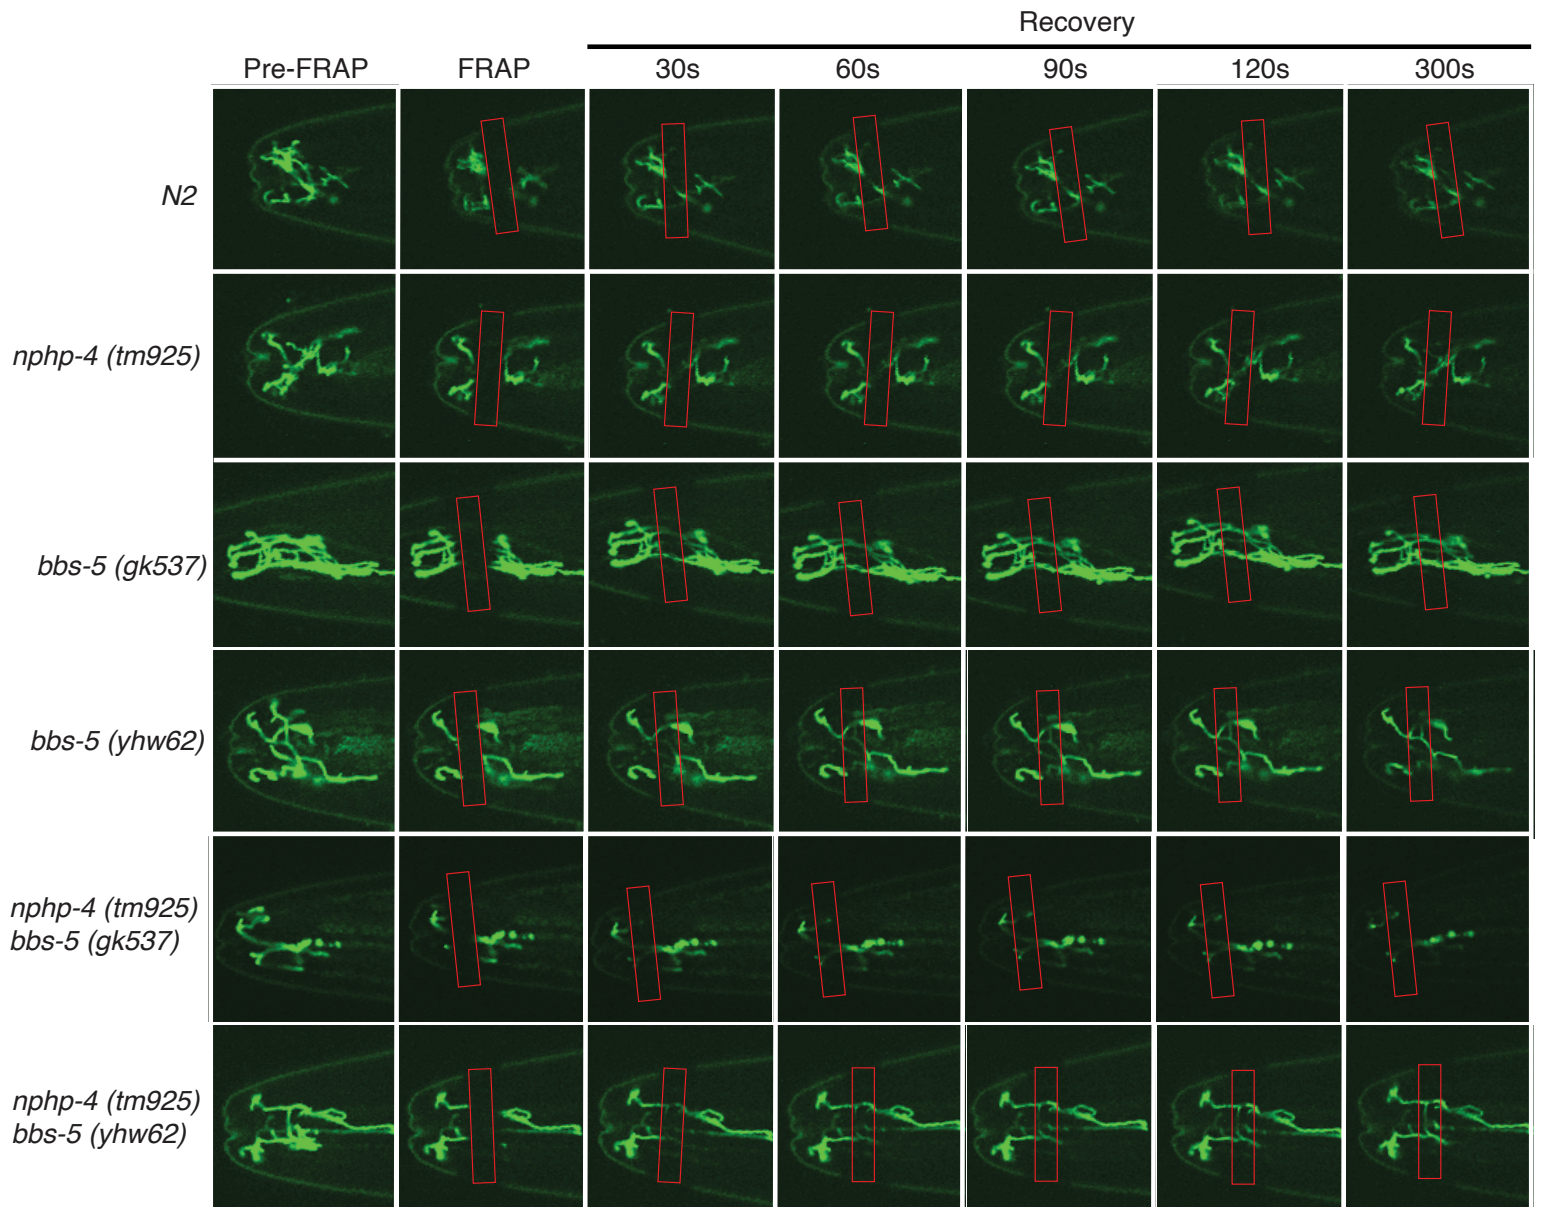

Source: http://biorxiv.org/content/10.1101/2021.08.25.457729v1.full.pdf
